# Supplementary material for: Bisulfighter: accurate detection of methylated cytosines and differentially methylated regions
Source: PubMed Central journal article supplement — Nucleic Acids Res. 2014 Jan 13;42(6):e45. doi: 10.1093/nar/gkt1373 (PMC3973284; doi:10.1093/nar/gkt1373), 2014-01-13

# Supplementary Information

## Bisulfighter: accurate detection of methylated cytosines and differentially methylated regions

Yutaka Saito<sup>1,2</sup>, Junko Tsuji<sup>3</sup>, Toutai Mituyama<sup>1,2,\*</sup>

<sup>1</sup>Computational Biology Research Center, National Institute of Advanced Industrial Science and Technology (AIST), 2-4-7 Aomi, Koto-ku, Tokyo 135-0064, Japan.

<sup>2</sup>Japan Science and Technology Agency, CREST, 4-1-8 Honcho, Kawaguchi, Saitama 332-0012, Japan.

<sup>3</sup>Program in Bioinformatics and Integrative Biology, University of Massachusetts Medical School, 55 Lake Avenue North, Worcester, Massachusetts 01655, USA.

\* To whom correspondence should be addressed:

mituyama-toutai@aist.go.jp

# Supplementary Note 1

## **Details for mC calling by other methods**

We compared accuracy of mC calling between Bisulfighter and ten other tools. They included Bismark and BS\_Seeker, which both use Bowtie in the read mapping procedure, and another Bowtie-based method used in Lister *et al.* 2011 (denoted by *Lister*). Also included were BatMeth, BRAT, BSMAP, BSmooth, MethylCoder, RMAP, and Novoalign. After mapping reads, mC levels were estimated by scripts enclosed in the software packages, or the same procedure as in Bisulfighter if such scripts were not available. We used the recommended combination of options for tuning each tool. These options were obtained from original papers, manuals in software packages, or personal communications with software developers. For BRAT, BSMAP, and Novoalign, since multiple combinations of options were recommended, we conducted separate experiments to determine the best settings (Supplementary Figures 13-15). The optimized options and further details are described in Supplementary Note 2.

## **Details for DMR detection by other methods**

Bisulfighter was compared with other methods for DMR detection found in the previous studies (Hansen *et al.* 2012; Lister *et al.* 2011). Due to limited availability or applicability of software packages, these methods were re-implemented in the present study if needed. We implemented a method based on the Fisher's exact test (denoted by *Fisher*) (Lister *et al.* 2011), which determines individual DMCs by the statistical test, then chains neighbor DMCs using the distance parameter of 300 bp. The method controls the number of output DMRs by changing the threshold for *P*-values in the statistical tests. We also implemented a method based on smoothing techniques used in the BSmooth package (denoted by *Smoothing*) (Hansen *et al.* 2012). Since the original version of BSmooth requires biological replicates for DMR detection, we implemented a modified version applicable to samples without replicates. Specifically, the modified method performs smoothing of mC levels, detects individual DMCs based on the difference in smoothed mC levels, and then chains neighbor DMCs within 300 bp. The method controls the number of output DMRs by changing the difference threshold for smoothed mC levels. We used the distance parameter of 300 bp as recommended in the original paper describing BSmooth (Hansen *et al.* 2012).

The BSmooth package has its own module for mC calling. However, we found that mC calling by BSmooth resulted in poor performance (Figure 2). To focus our evaluation on accuracy of DMR detection, alignment results of LAST were used as the common input for Bisulfighter, Smoothing, and Fisher.

# Supplementary Note 2

## BatMeth

BatMeth 1.03 was executed with the following commands:

```
batmeth -g reference.fa -i reads.fastq -n 3 -o filePrefix -O 1 -p 2
split mappingOut.txt reference.fa 3 y filePrefix.0 filePrefix.2
```

After mapping reads, we counted mCs for each context, and calculated mC levels by dividing the mC counts by the number of reads mapped at the column.

## Bismark

Bismark v0.7.6 was executed with the following commands:

```
bismark_genome_preparation --verbose wkdir && cd wkdir
trimReadEnd -q 3 reads.fastq > trimmed.fastq
bismark -n 2 -l 50 wkdir trimmed.fastq
methylation_extractor -s --comprehensive mappingOut.sam
```

trimReadEnd is an in-house script to trim the 3'-end of reads to just before the first base with phred scores below threshold. In the above commands, we used the quality threshold of 3.

## BRAT

BRAT 1.2.4 was executed with the following commands:

```
trim -s reads.fastq -P filePrefix -q $q -m 2
brat -r refFileNames.txt -s filePrefix_reads1.txt -bs -m $m -f $f ¥
-o mappingOut.txt
acgt-count -r refFileNames.txt -P mappingOut.txt -s mcResultPrefix -B
```

We tested three combinations of options,  $(q, m, f) = (3, 0, 36), (3, 1, 36), (0, 4, 64)$ , and determined  $(3, 1, 36)$  as the best setting (Supplementary Figure 13).

## BS\_Seeker

BS\_Seeker was executed with the following commands:

```
python BS_Seeker.py -d referenceDir/ -i reads.fastq -t N -e 50 -m 3 ¥
-p bowtie-0.12.8/ -o mappingOut.txt
```

After mapping reads, we counted mCs for each context, and calculated mC levels by dividing the mC counts by the number of reads mapped at the column.

## BSMAP

BSMAP 2.72 was executed with the following commands:

```
bsmap -a reads.fastq -d refence.fa -o mappingOut.txt -v 10 -s 16 -w 2
```

After mapping reads, we tested two options for mC calling which care about SNPs or not:

```
methratio.py -o mcResult.txt -d reference.fa -i 'correct' mappingOut.txt  
methratio.py -o mcResult.txt -d reference.fa mappingOut.txt
```

The option aware of SNPs was determined as the best setting (Supplementary Figure 14).

## **BSmooth**

BSmooth 0.7.0 was executed with the following commands:

```
perl bs_merman_align.pl --bsc ¥  
  --merman=bsmooth-align-0.7.0/merman/merman ¥  
  --output=dirPrefix -- reference.fa -- reads.fastq  
perl bsev_sort.pl --ev=dirPrefix/ --out=dirPrefix_sort/  
perl bsev_tabulate.pl --c=mcResult -- dirPrefix_sort -- reference.fa
```

## **Lister**

We followed the whole procedure described in the literature (Lister *et al.* 2011) except the adaptor-trimming step which is not necessary for our simulated data.

## **MethylCoder**

MethylCoder 5b849ac was executed with the following commands:

```
methylcoder --gsnap gmap-2012-07-20/bin --outdir mappingOutDir ¥  
  --extra-args '--quiet-if-excessive --npaths1' --mismatches=2 ¥  
  --reference reference.fa reads.fastq
```

After mapping reads, we counted mCs for each context, and calculated mC levels by dividing the mC counts by the number of reads mapped at the column.

## **RMAP**

RMAP v2.05 was executed with the following commands:

```
rmapbs -v -Q -B -F refFileNames.txt -o mappingOut.txt reads.fastq
```

After mapping reads, we counted mCs for each context, and calculated mC levels by dividing the mC counts by the number of reads mapped at the column.

## **Novoalin**

Novoalign V2.08.02 was executed with the following commands:

```
novoalign -b 2 -c 1 --Q20off -d reference.fa -o SAM -t $t ¥  
  -f reads.fastq > mappingOut.txt
```

We tested three options,  $t = 60, 90$  or the default value, and determined the default value as the best setting (Supplementary Figure 15). After mapping reads, we counted mCs for each mC context using samtools and scripts in the Novoalign package as follows:

```
grep -e "^@¥|ZB:Z:CT" mappingOut.txt | samtools view -T chrom -ubS - | ¥
    samtools sort - filePrefix.ct
grep -e "^@¥|ZB:Z:GA" mappingOut.txt | samtools view -T chrom -ubS - | ¥
    samtools sort - filePrefix.ga
samtools mpileup -BC 0 ¥
    -f reference.fa filePrefix.ct.bam filePrefix.ga.bam ¥
    > filePrefix.mpileup
novomethyl filePrefix.mpileup > mcResult.txt
```

## Supplementary table legends

**Supplementary Table 1. Summary of the datasets.** (a) Simulated data. Mean error rates were calculated from Phred scores of reads. In the actual simulation, errors were introduced in a position-specific manner by DNemulator. (b) Real data. Any of the real datasets was produced from multiple sequencing experiments, and thus may consist of both single- and paired-end reads with various lengths. Source: identifier in the Sequence Read Archive. WGBS: whole-genome bisulfite sequencing. RRBS: reduced representation bisulfite sequencing.

**Supplementary Table 2. Computational cost of each tool.** Computation time was shown for 3M simulated reads, evaluated on the Intel Xeon 2.53 GHz CPU.

# Supplementary figure legends

**Supplementary Figure 1. Tuning Bisulfighter options in mC calling.** Experiments similar to Supplementary Figures 5-7 were conducted. bf: Bisulfighter. ct: equal treatment of Cs and Ts. prob: weighting by alignment probability. qual: weighting by read quality.

**Supplementary Figure 2. Distinct distance distributions among neighbor DMCs observed in real data.** We conducted mC calling by Bisulfighter, and determined high confidence DMCs whose change in mC levels was more than 0.2 (UP), less than -0.2 (DOWN), or neither (NoCh). **(a)** Carcinogenesis dataset. **(b)** Adipogenesis dataset. **(c)** Hematopoiesis dataset. **(d)** Fibroblast development dataset. **(e)** Aging dataset. **(f)** Social rank dataset. **(g)** Neuronal development dataset. **(h)** Tet1 mutation dataset. **(i)** Leukemia subtype dataset. **(j)** IDH1 mutation dataset. See Supplementary Table 1b for the details of datasets. Analysis was focused on DMCs with a sufficient number of aligned reads (more than 20 for **a** and **b**; more than 10 for the others). **(k)** Statistical significance of the differences between distance distributions. *P*-values were calculated by the Kolmogorov-Smirnov test.

**Supplementary Figure 3. State transition diagrams for HMMs in Bisulfighter.** **(a)** Naïve model with one pair of states per direction. **(b)** Dual model with two pairs of states per direction.

**Supplementary Figure 4. Estimation of mC levels at selected CpG sites above coverage threshold.** Distributions of errors between estimated and true mC levels are shown as box plots (25th-75th percentile). CpG sites were selected by coverage threshold of **(a)** 3X, **(b)** 5X, and **(c)** 10X. **(d)** The number of captured CpG sites for given coverage threshold.

**Supplementary Figure 5. Benchmark for mC calling in binary classification of mCs.** For each context, cytosines were called as mCs if non-zero mC levels were estimated. Trade-off between the true positive rates and the number of false positives is shown for varying sequencing depth. Dataset A: low quality reads. Dataset B: high quality reads.

**Supplementary Figure 6. Binary classification of mCs at varying sequencing depths.** For each context, cytosines were called as mCs if non-zero mC levels were estimated. The true positive rate (TPR) and the false discovery rate (FDR) are shown for each sequencing depth. In FDR figures, the right panel is a closeup of the left panel. Dataset A: low quality

reads. Dataset B: high quality reads.

**Supplementary Figure 7. Benchmark for mC calling in estimation of mC levels.**

Distributions of errors between estimated and true mC levels are shown as box plots (25th-75th percentile). Dataset A: low quality reads. Dataset B: high quality reads.

**Supplementary Figure 8. Benchmark for DMR detection at varying sequencing depth.**

For each DMR length, true positives with 50% reciprocal overlap are shown.

**Supplementary Figure 9. Accuracy in determining individual DMCs.**

Accuracy is evaluated by the area under the receiver operating characteristic curve (AUC) in which DMCs are detected by varying thresholds for posterior probabilities (Bisulfighter), difference in smoothed mC levels (Smoothing), and *P*-values in statistical tests (Fisher).

**Supplementary Figure 10. Benchmark for mC calling and DMR detection with the GC-rich chromosome 19.**

Experiments similar to (a) Figure 2b, (b) Figure 2c, and (c) Figure 3a were conducted using the chromosome 19, instead of the chromosome X, for simulating bisulfite-converted reads.

**Supplementary Figure 11. Agreement between DMRs and DEGs determined by various thresholds of expression fold change.**

The dashed vertical line indicates 5-fold expression change used in Figure 3c.

**Supplementary Figure 12. Agreement between DMRs and DSSs for TSS-proximal and TSS-distal regions at various resolutions.**

Proximal and distal regions are separated by means of the 5 kbp distance from the nearest TSS.

**Supplementary Figure 13. Tuning BRAT options in mC calling.**

Experiments similar to Supplementary Figures 5-7 were conducted. See Supplementary Note 2 for details.

**Supplementary Figure 14. Tuning BSMAP options in mC calling.**

Experiments similar to Supplementary Figures 5-7 were conducted. See Supplementary Note 2 for details.

**Supplementary Figure 15. Tuning Novoalign options in mC calling.**

Experiments similar to Supplementary Figures 5-7 were conducted. See Supplementary Note 2 for details.



**a** Simulated data

| Name                     | Error source | Mean error rate (%) | Read          | Depth (M reads)        | Protocol |
|--------------------------|--------------|---------------------|---------------|------------------------|----------|
| Dataset A (low quality)  | SRR019072    | 1.11                | Single, 87 bp | 1, 3, 5, 7, 10, 20, 50 | WGBS     |
| Dataset B (high quality) | SRR094461    | 0.41                | Single, 85 bp | 1, 3, 5, 7, 10, 20, 50 | WGBS     |

**b** Real data

| Name                   | Sample 1                            | Sample 2                           | Analysis in this study                             | Species | Read   | Protocol | Source    | Reference              |
|------------------------|-------------------------------------|------------------------------------|----------------------------------------------------|---------|--------|----------|-----------|------------------------|
| Carcinogenesis         | Breast cancer                       | Normal breast                      | Gene expression,<br>Distance distribution          | Human   | Single | WGBS     | SRP006728 | Hon et al., 2012       |
| Adipogenesis           | Mature fat cell                     | Adipose-derived stem cell          | Gene expression,<br>Distance distribution          | Human   | Paired | WGBS     | SRP003529 | Lister et al., 2011    |
| Hematopoiesis          | Mature B cell                       | Hematopoietic stem cell            | DNase I hypersensitivity,<br>Distance distribution | Human   | Both   | WGBS     | SRP008144 | Hodges et al., 2011    |
| Fibroblast development | Foreskin fibroblast                 | Embryonic stem cell                | DNase I hypersensitivity,<br>Distance distribution | Human   | Both   | WGBS     | SRP001720 | Laurent et al., 2010   |
| Aging                  | Centenarian                         | Newborn                            | Distance distribution                              | Human   | Paired | WGBS     | SRP007820 | Heyn et al., 2012      |
| Social rank            | High-rank individual                | Low-rank individual                | Distance distribution                              | Rhesus  | Single | WGBS     | SRP009594 | Tung et al., 2012      |
| Neuronal development   | Neuronal progenitor cell            | Embryonic stem cell                | Distance distribution                              | Mouse   | Both   | WGBS     | SRP007354 | Stadler et al., 2011   |
| Tet1 mutation          | Tet1-null primordial germ cell      | Wildtype primordial germ cell      | Distance distribution                              | Mouse   | Both   | WGBS     | SRP016883 | Yamaguchi et al., 2012 |
| Leukemia subtype       | GMP-derived acute myeloid leukemia  | HSC-derived acute myeloid leukemia | Distance distribution                              | Mouse   | Single | RRBS     | SRP017807 | Krivtsov et al., 2013  |
| IDH1 mutation          | IDH1(R132H) hematopoietic stem cell | Wildtype hematopoietic stem cell   | Distance distribution                              | Mouse   | Single | RRBS     | SRP013732 | Sasaki et al., 2012    |

# Supplementary Table 2

---

| Tool         | Time (m) |
|--------------|----------|
| BatMeth      | 92       |
| Bismark      | 138      |
| BRAT         | 284      |
| BS_Seeker    | 61       |
| BSMAP        | 144      |
| BSmooth      | 3051     |
| Lister       | 126      |
| MethylCoder  | 8271     |
| RMAP         | 427      |
| Novoalign    | 329      |
| Bisulfighter | 57       |

---

# Supplementary Figure 1

## Dataset A

### CpG

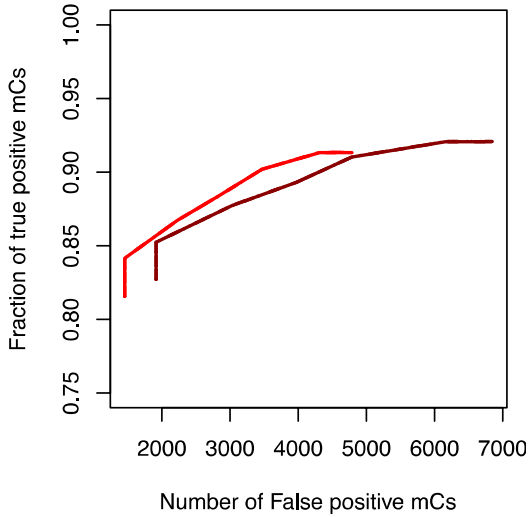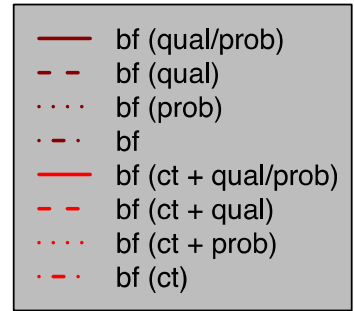

### CHG

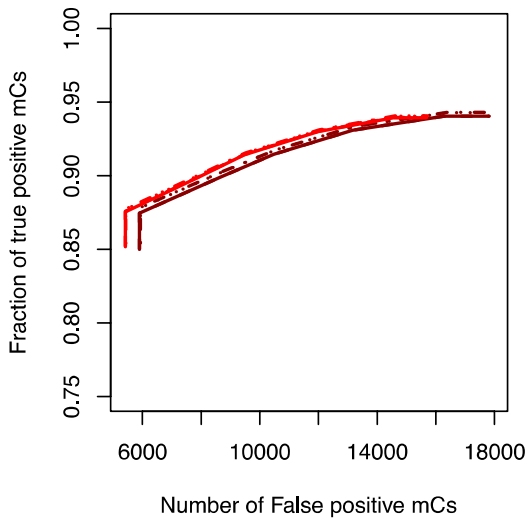

### CHH

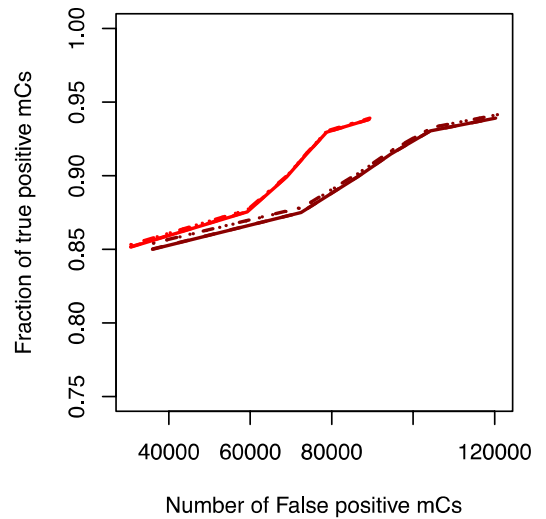

# Supplementary Figure 1 (continued)

## Dataset B

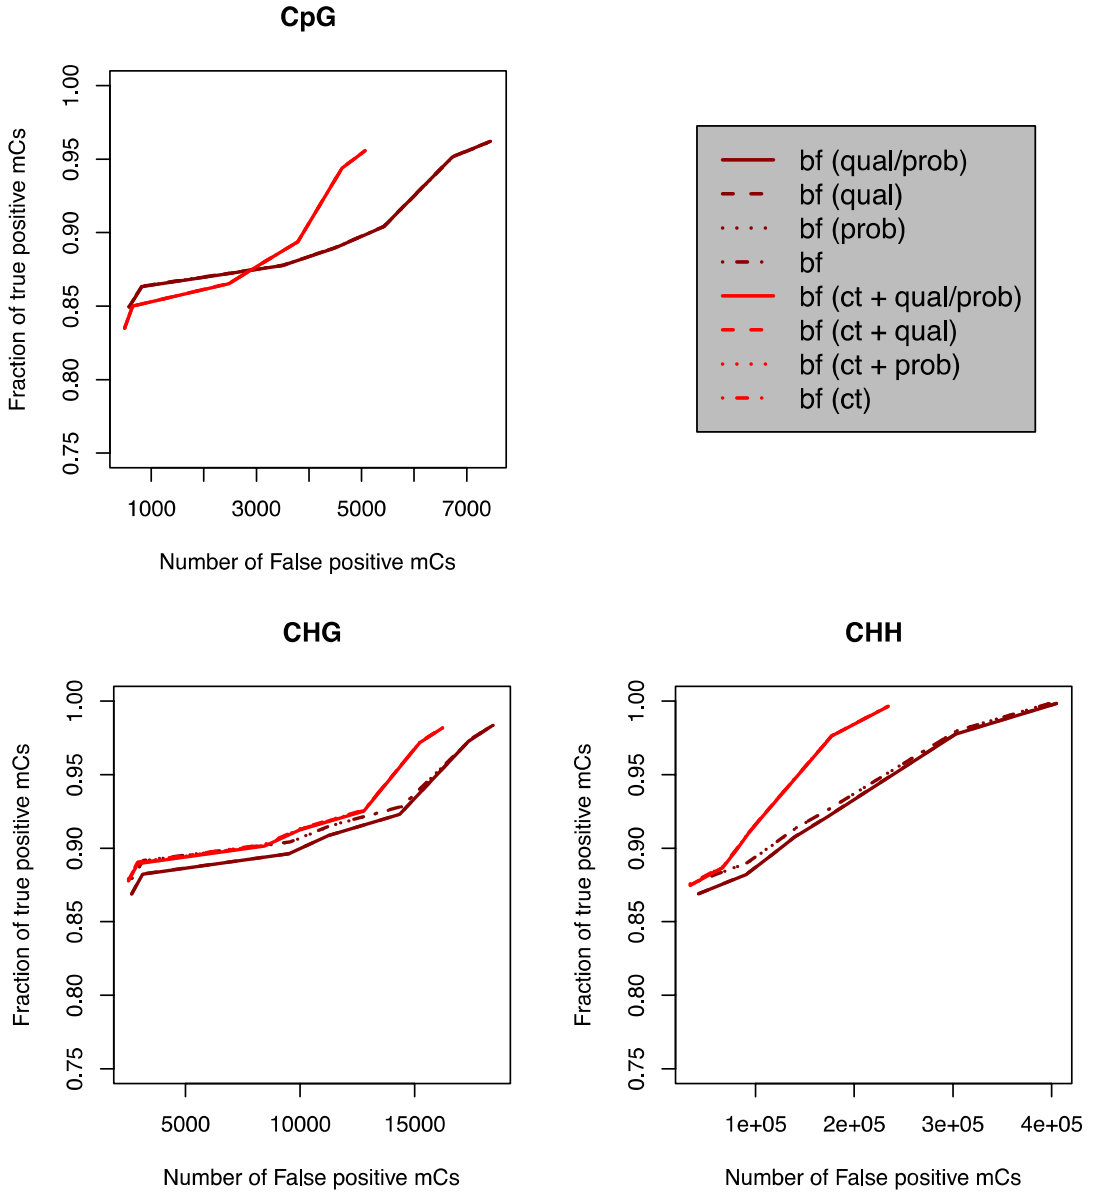

# Supplementary Figure 1 (continued)

## Dataset A

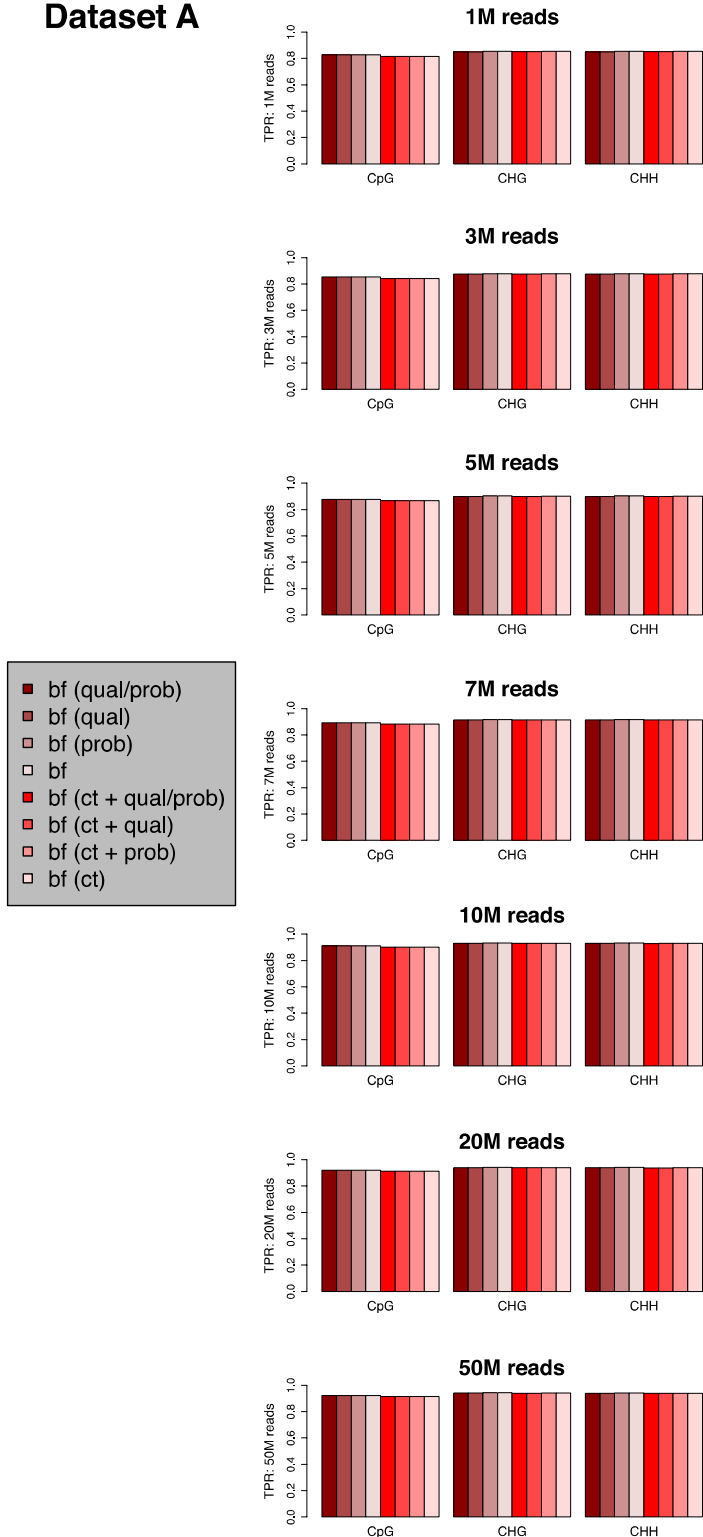

# Supplementary Figure 1 (continued)

## Dataset B

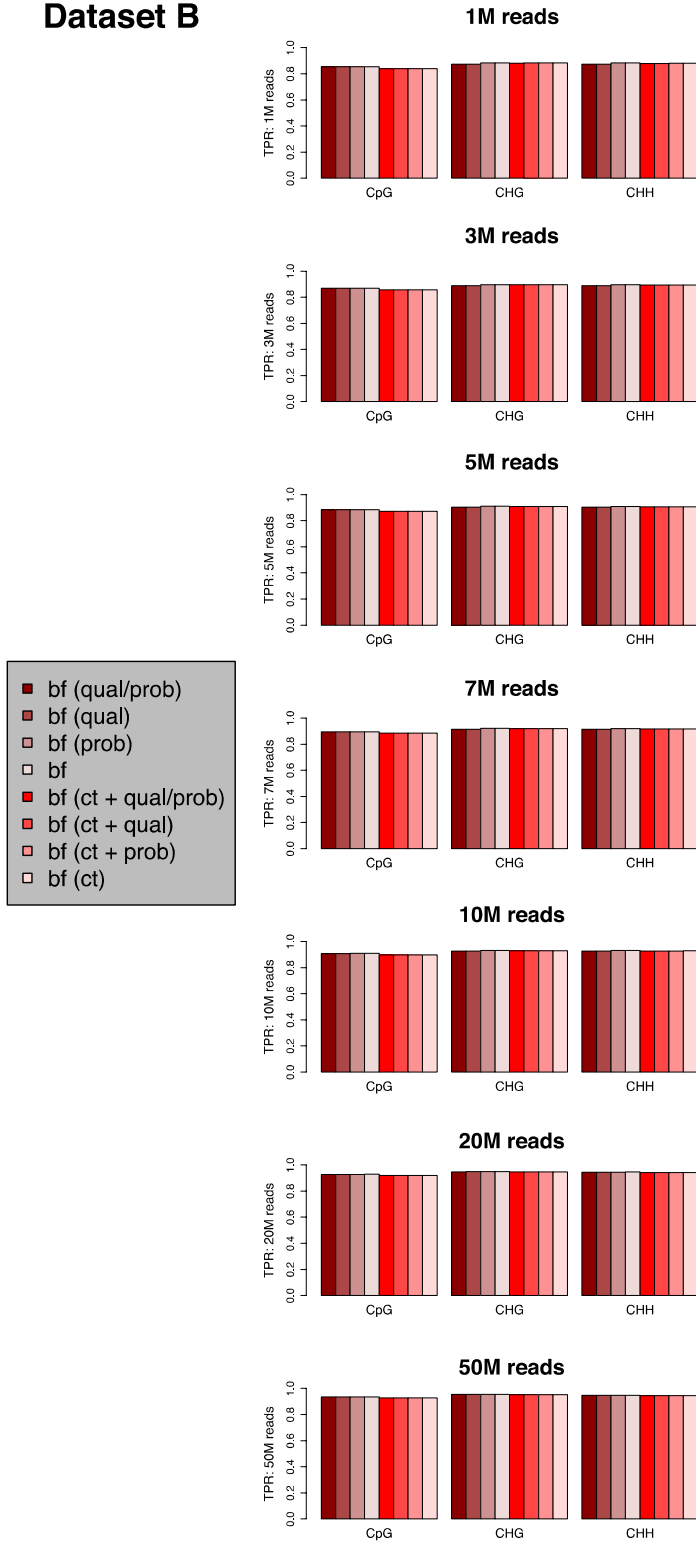

# Supplementary Figure 1 (continued)

## Dataset A

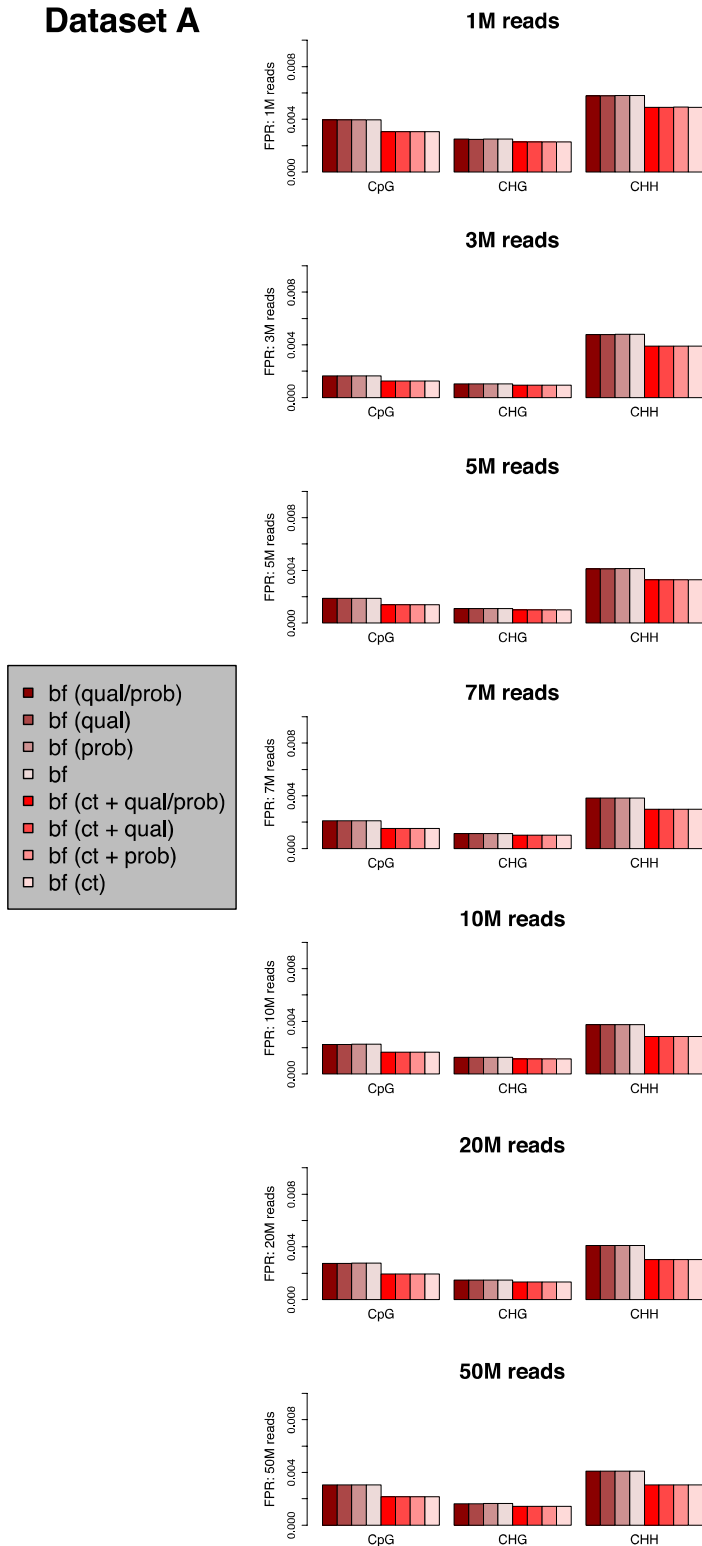

# Supplementary Figure 1 (continued)

## Dataset B

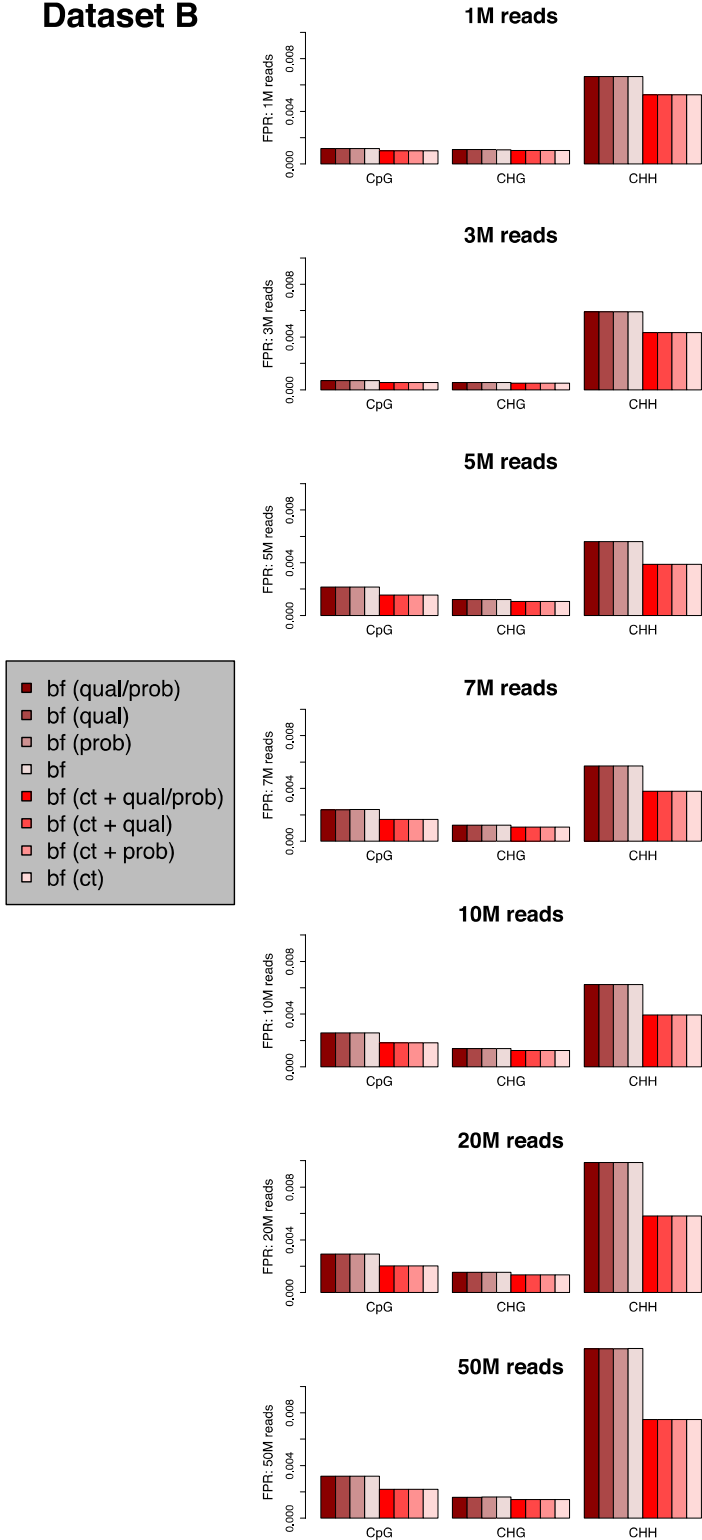



# Supplementary Figure 1 (continued)

## Dataset A

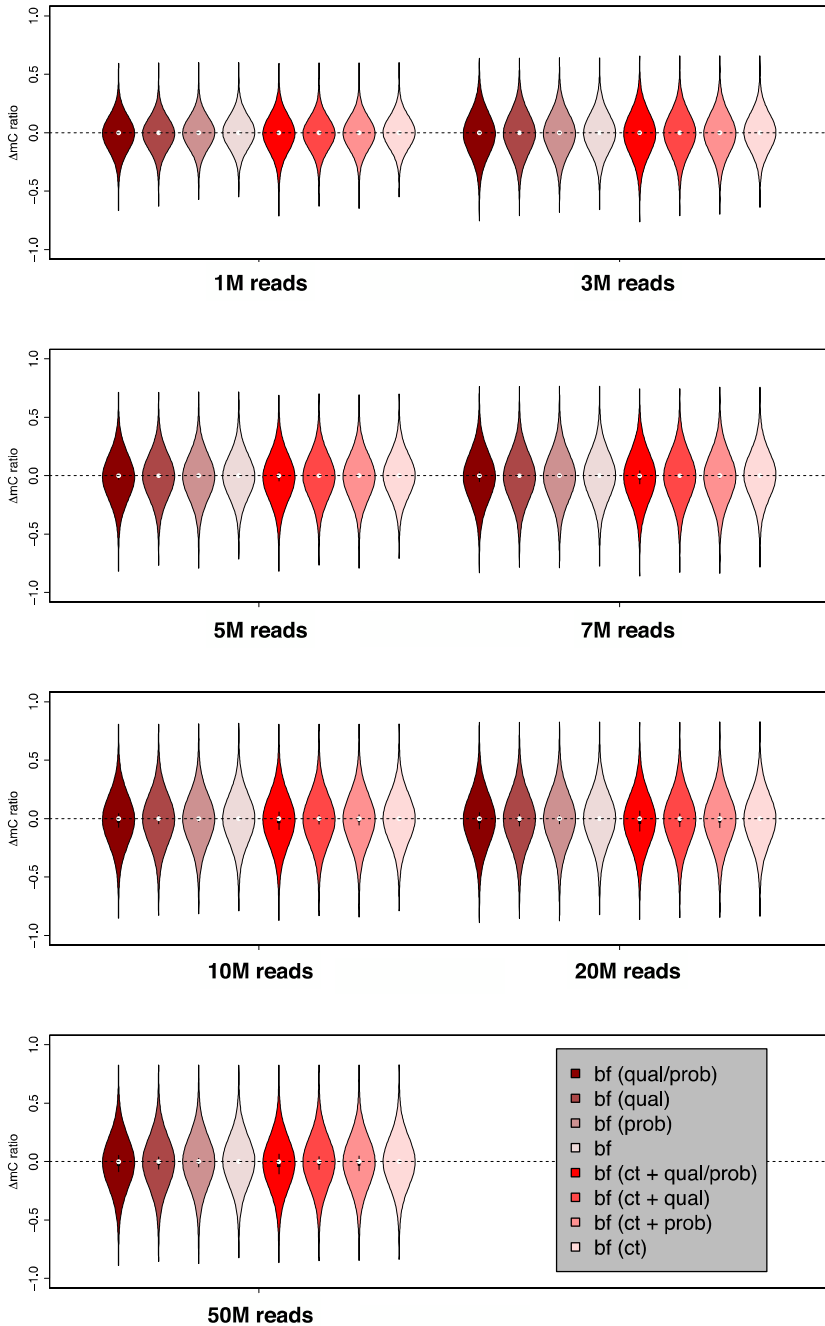

# Supplementary Figure 1 (continued)

## Dataset B

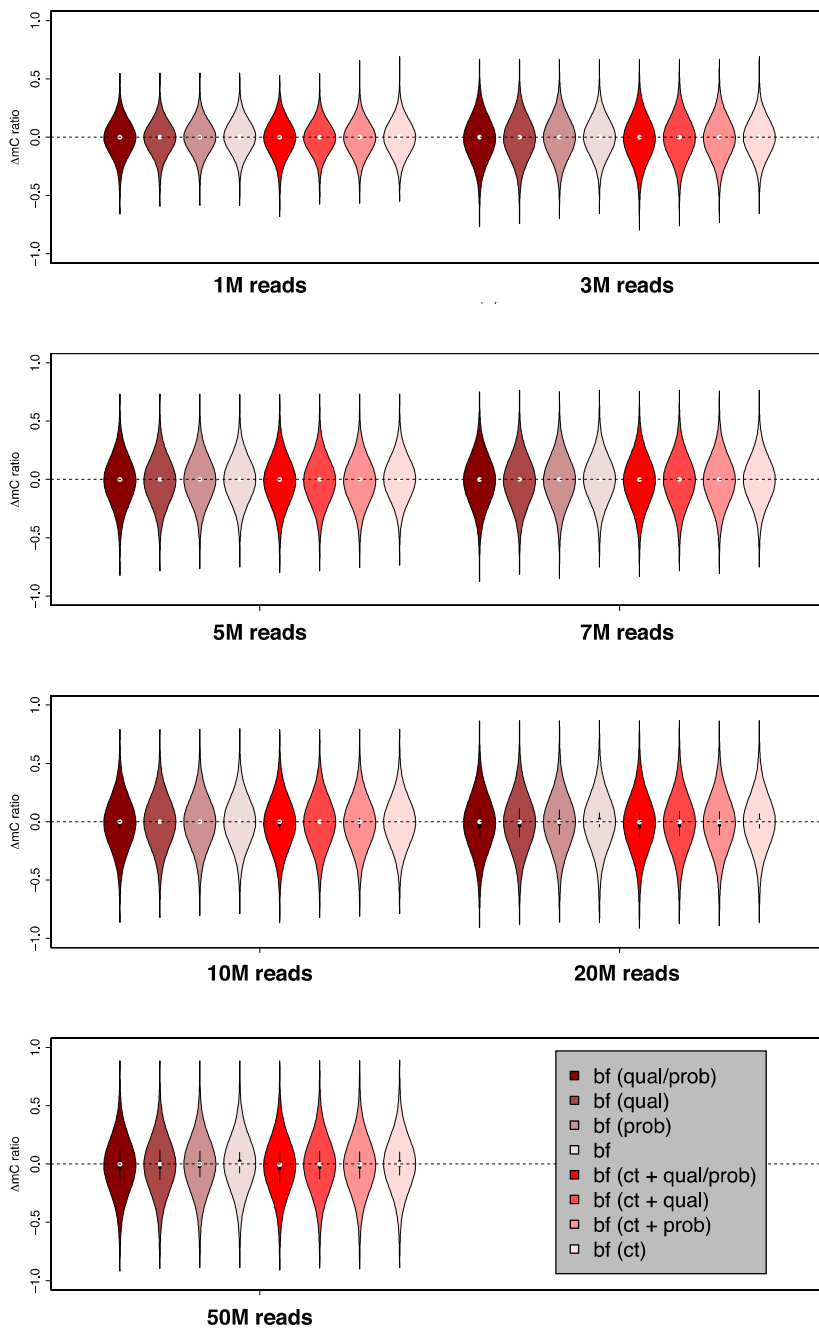

**a** Carcinogenesis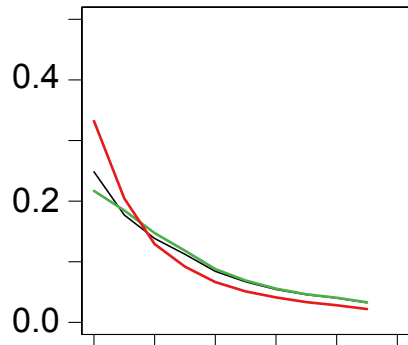**b** Adipogenesis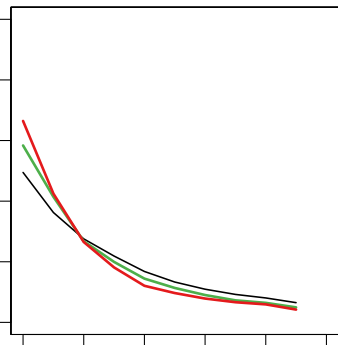**c** Hematopoiesis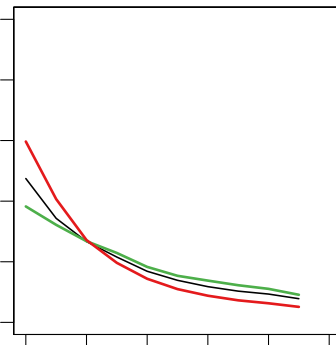**d** Fibroblast development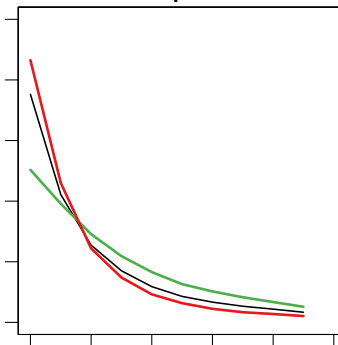**e** Aging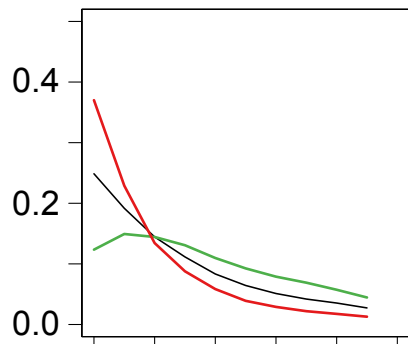**f** Social rank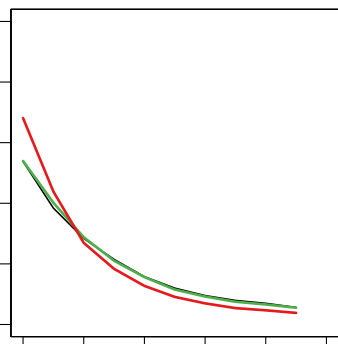**g** Neuronal development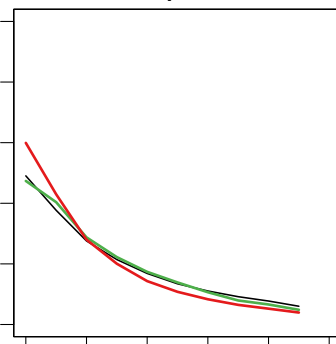**h** Tet1 mutation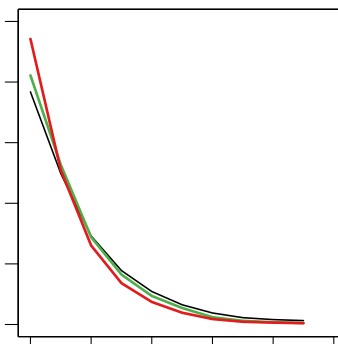**i** Leukemia subtype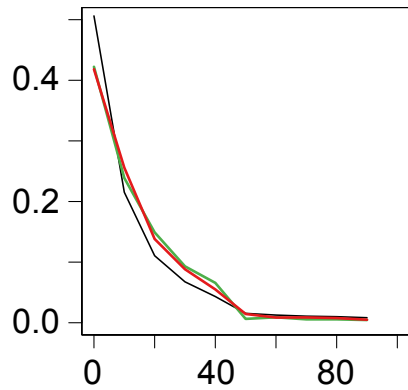**j** IDH1 mutation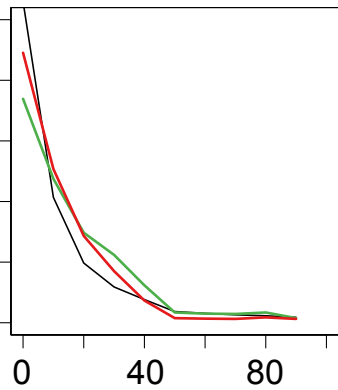

■ UP  
■ DOWN  
■ NoCh

Distance between neighbor CpGs (bp)

**k** Statistical significance

| Dataset                | <i>P</i> -value |              |            |
|------------------------|-----------------|--------------|------------|
|                        | UP<br>NoCh      | DOWN<br>NoCh | UP<br>DOWN |
| Carcinogenesis         | <1e-15          | <1e-15       | <1e-15     |
| Adipogenesis           | <1e-15          | <1e-15       | <1e-15     |
| Hematopoiesis          | <1e-15          | <1e-15       | <1e-15     |
| Fibroblast development | <1e-15          | <1e-15       | <1e-15     |
| Aging                  | <1e-15          | <1e-15       | <1e-15     |
| Social rank            | <1e-15          | 6e-15        | <1e-15     |
| Neuronal development   | <1e-15          | 7e-8         | <1e-15     |
| Tet1 mutation          | <1e-15          | <1e-15       | <1e-15     |
| Leukemia subtype       | <1e-15          | <1e-15       | 0.5        |
| IDH1 mutation          | <1e-15          | <1e-15       | 3e-13      |

**a** Naive model

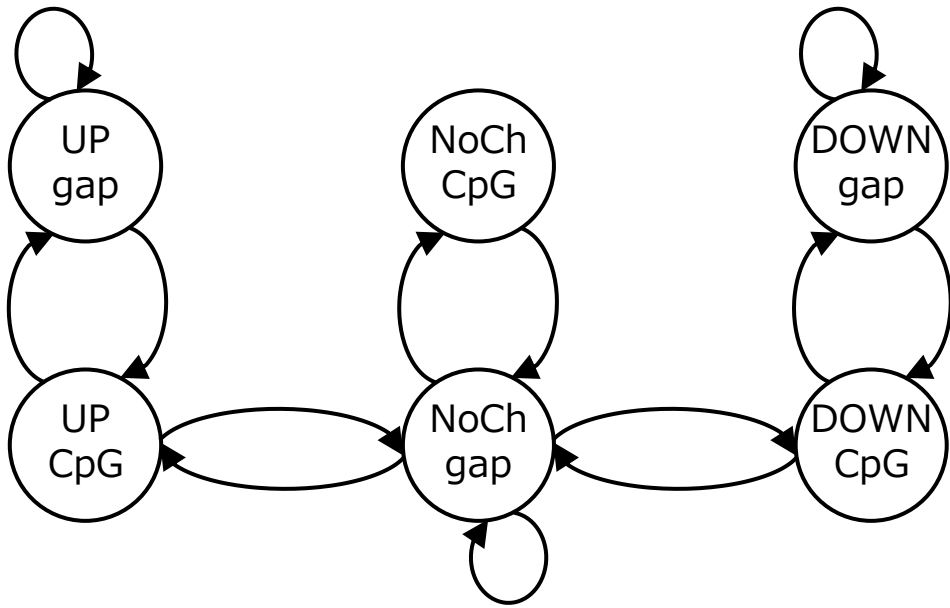

**b** Dual model

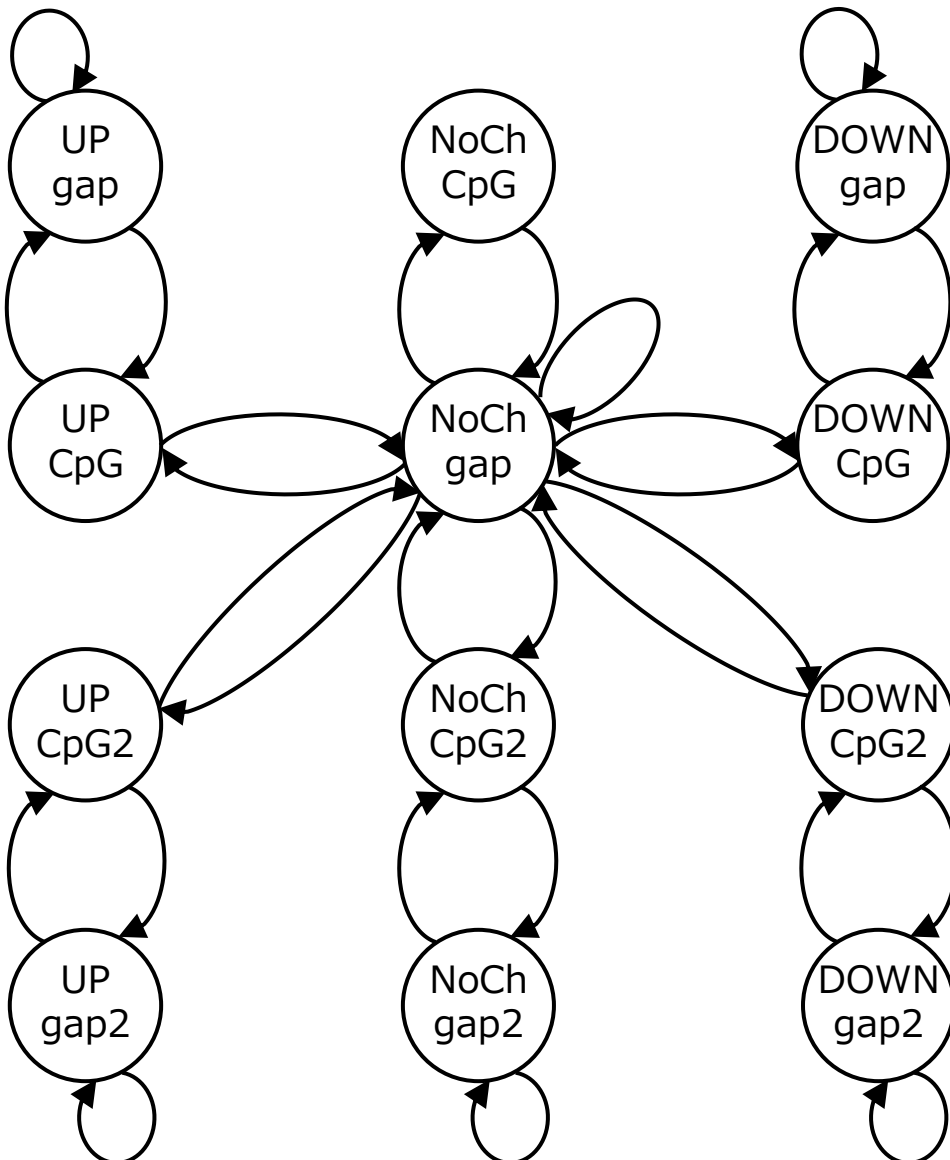

**a**

3X CpG

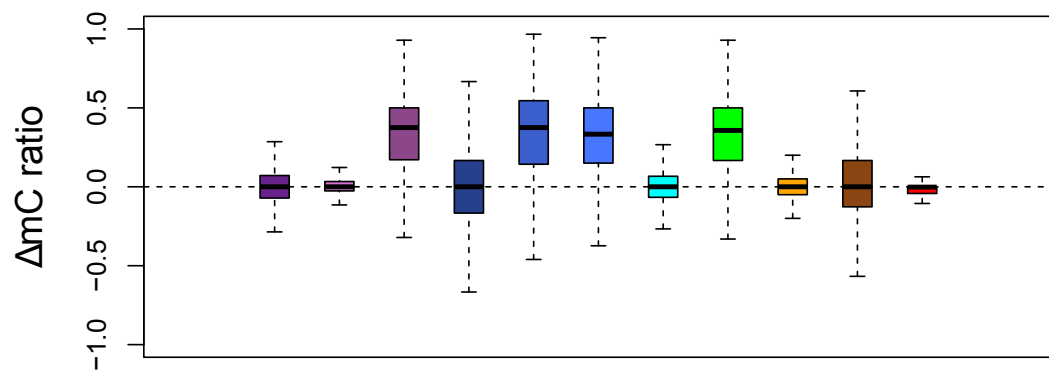**b**

5X CpG

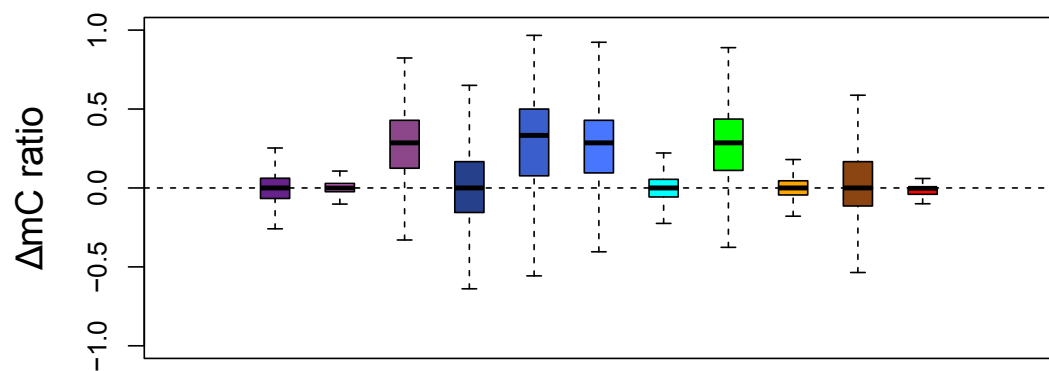**c**

10X CpG

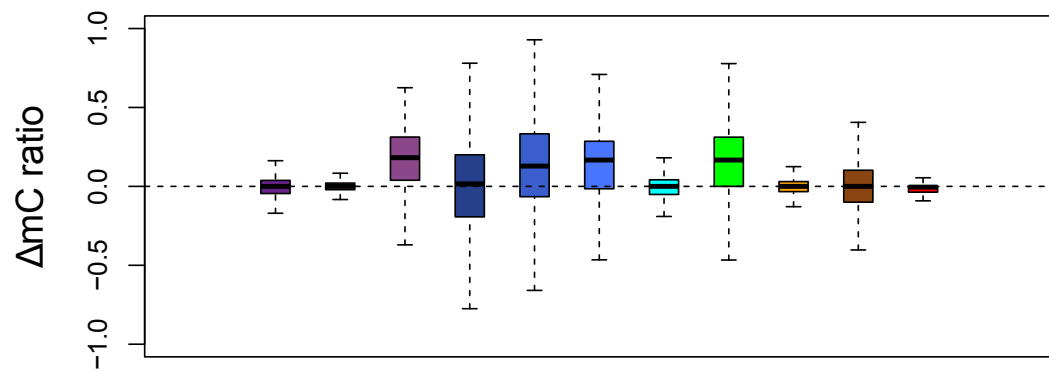**d**

| Tool         | Number of captured CpGs |         |        |
|--------------|-------------------------|---------|--------|
|              | 3X                      | 5X      | 10X    |
| BatMeth      | 2012940                 | 1350373 | 114417 |
| Bismark      | 2129912                 | 1684724 | 294281 |
| BRAT         | 913548                  | 259577  | 1043   |
| BS_Seeker    | 744921                  | 352094  | 10561  |
| BSMAP        | 598847                  | 221746  | 6387   |
| BSmooth      | 493924                  | 192207  | 1761   |
| Lister       | 1920353                 | 1370262 | 205598 |
| MethylCoder  | 1181911                 | 461315  | 6085   |
| RMAP         | 2102626                 | 1577052 | 216124 |
| Novoalign    | 1871710                 | 1224222 | 140024 |
| Bisulfighter | 2130895                 | 1700999 | 314585 |

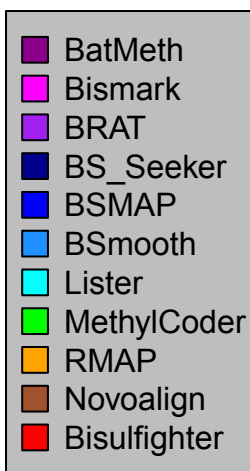

# Supplementary Figure 5

## Dataset A

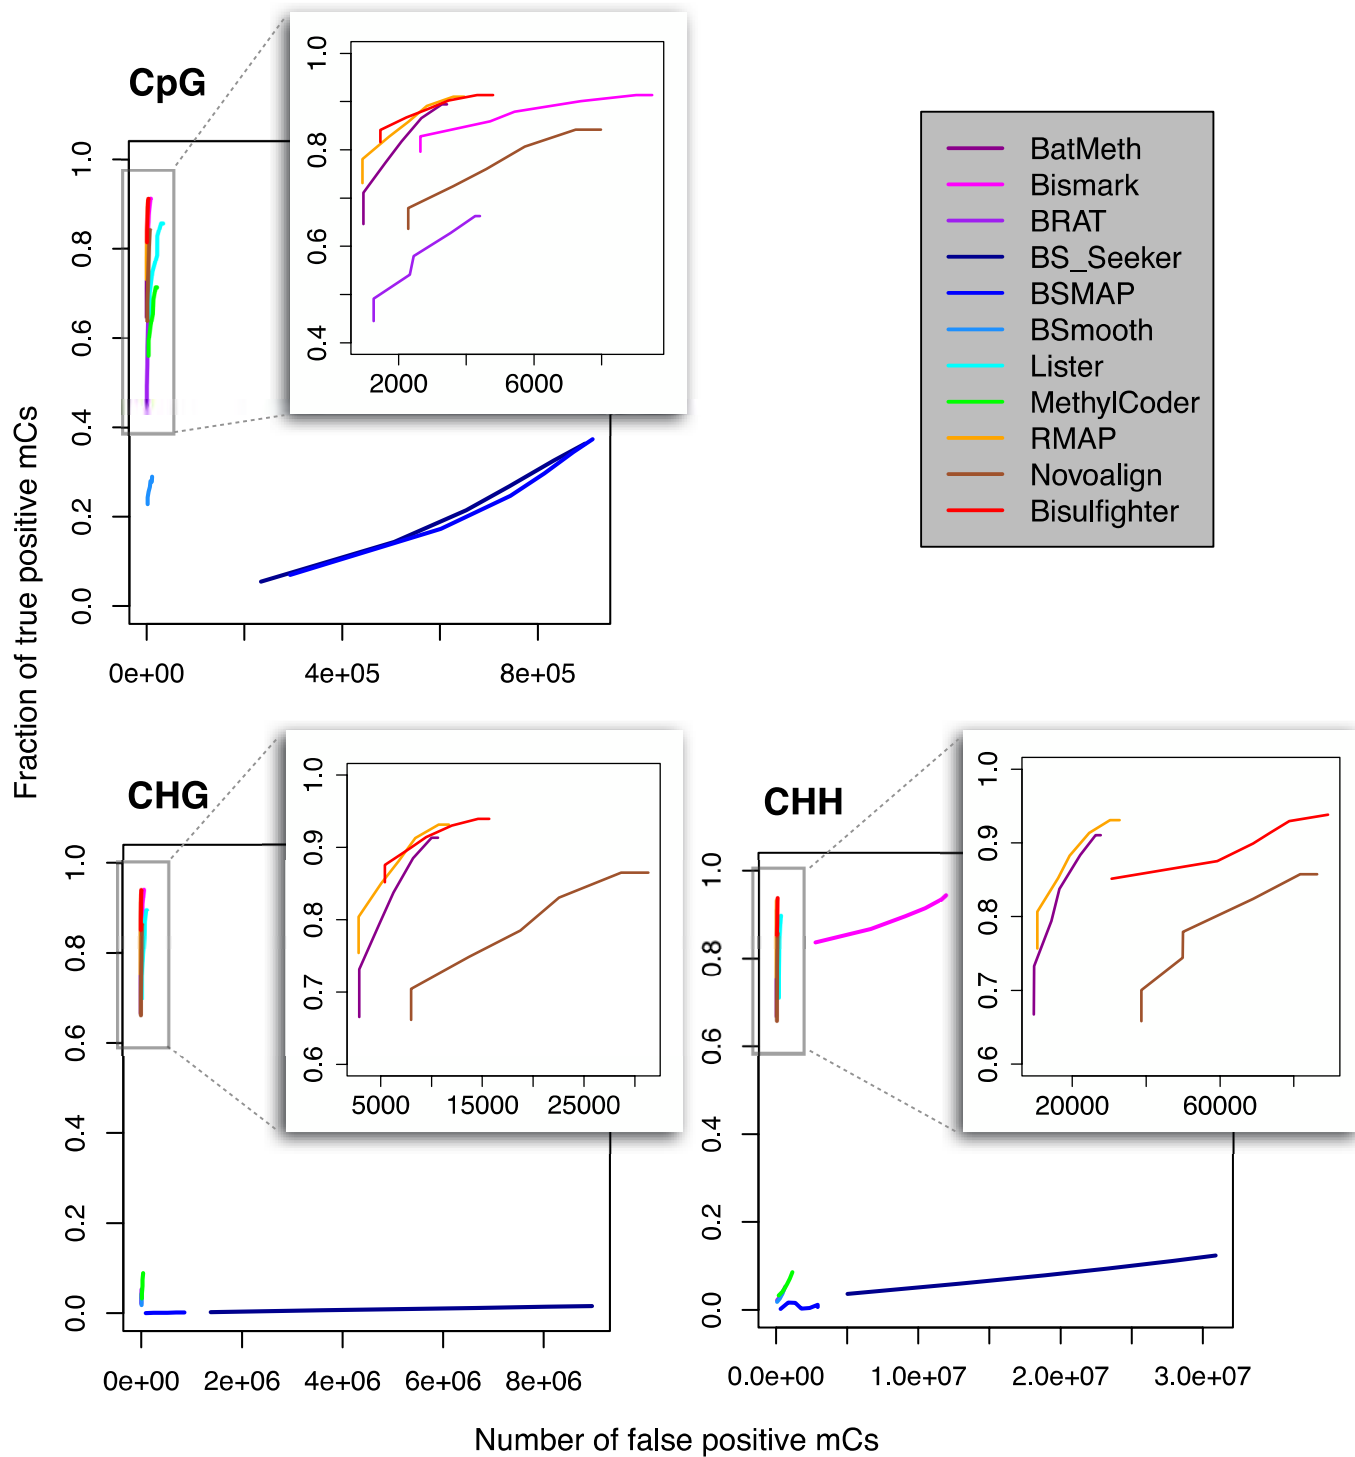

# Supplementary Figure 5 (continued)

## Dataset B

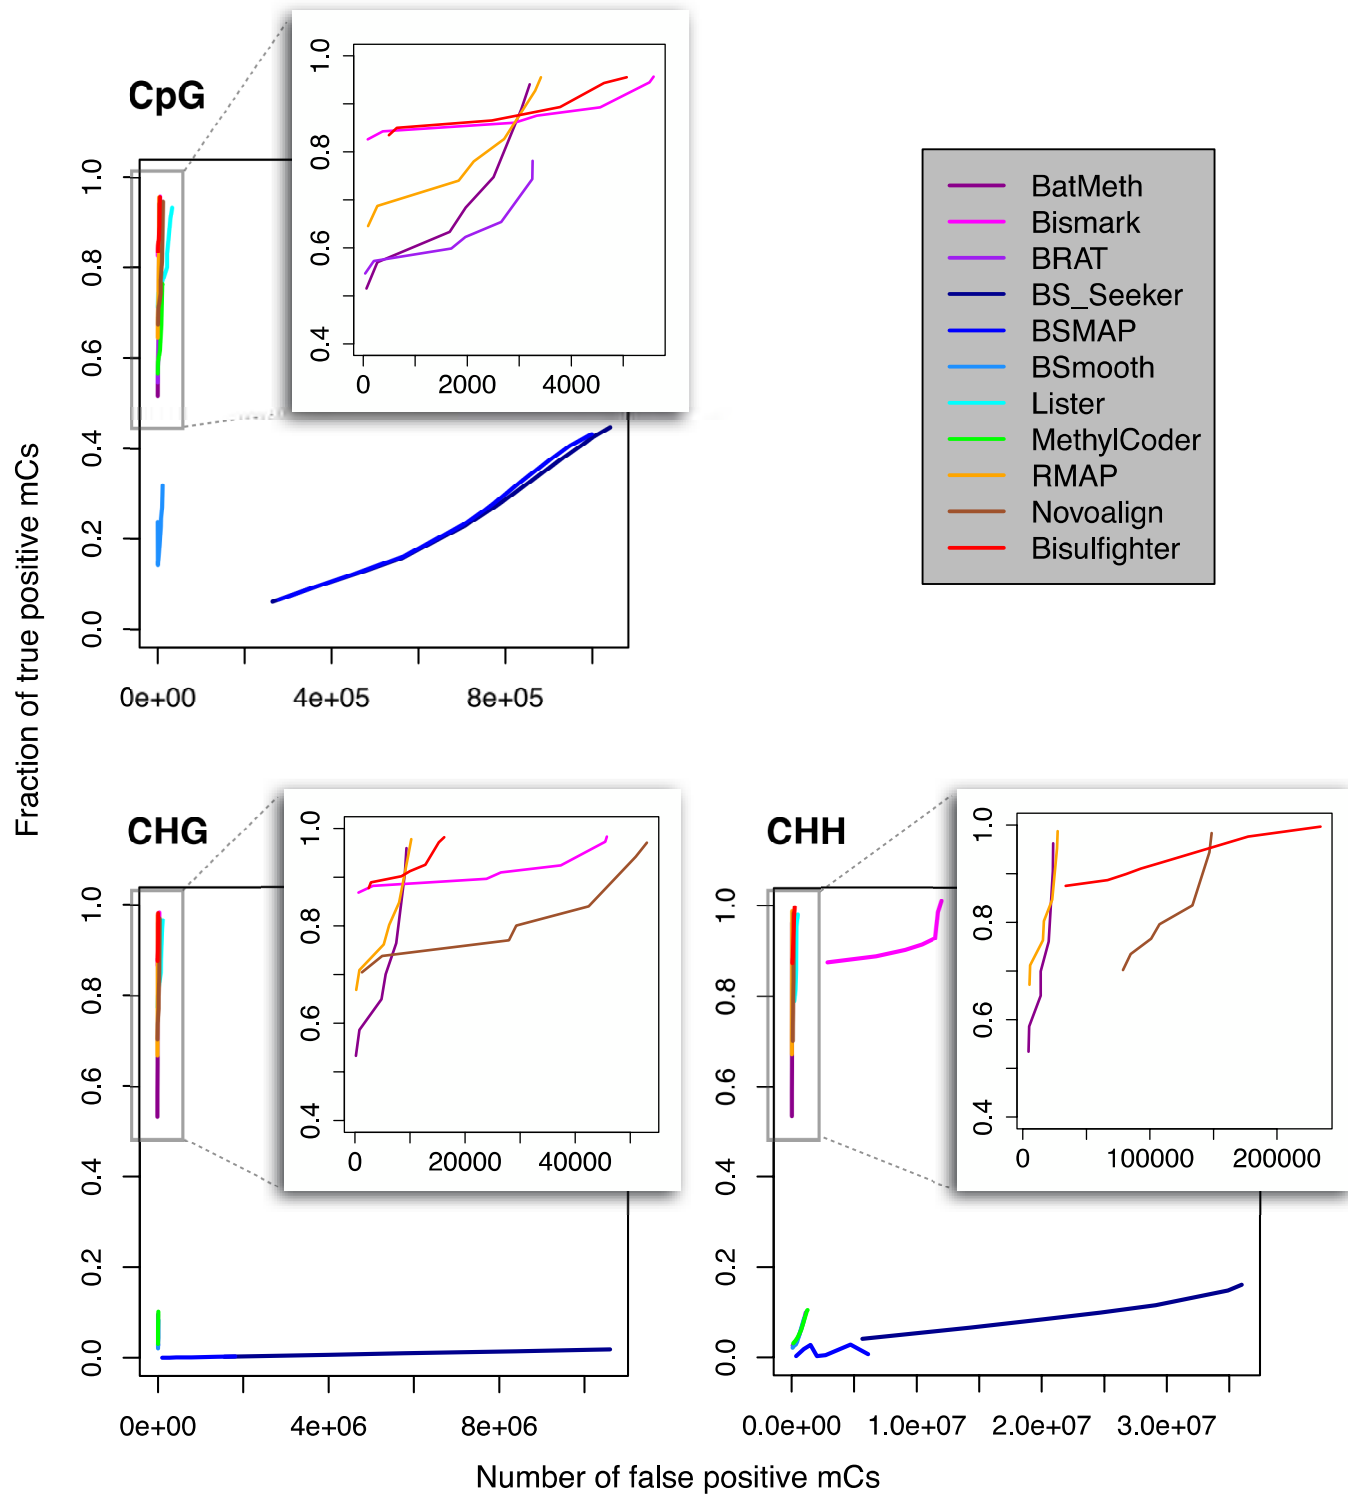

# Supplementary Figure 6

## Dataset A

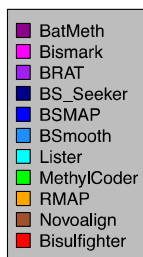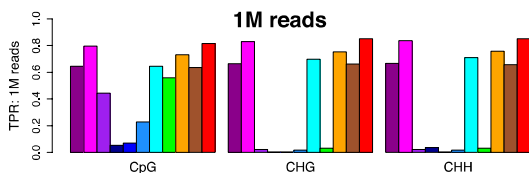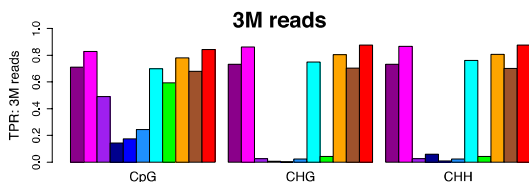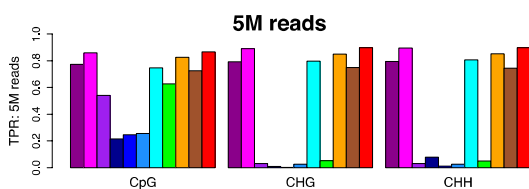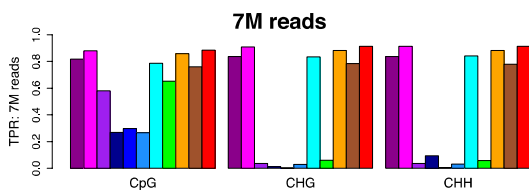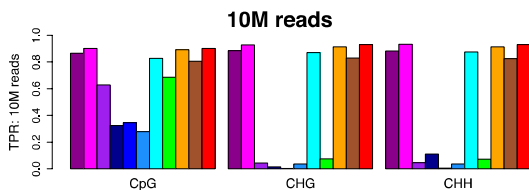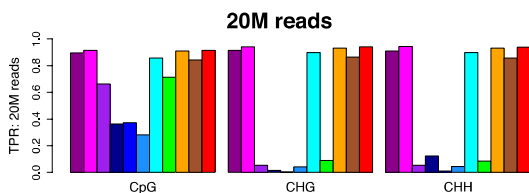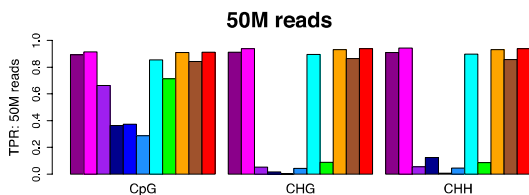



# Supplementary Figure 6 (continued)

## Dataset B

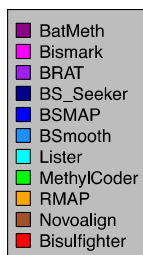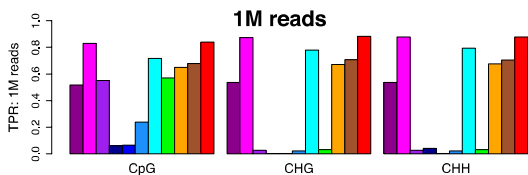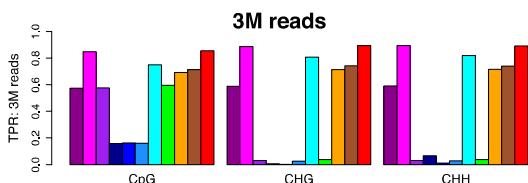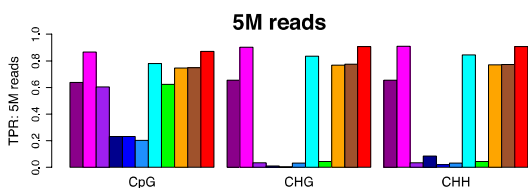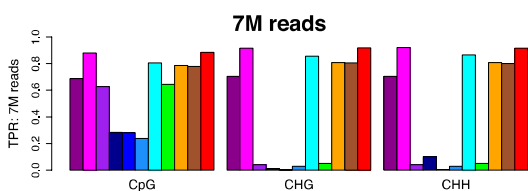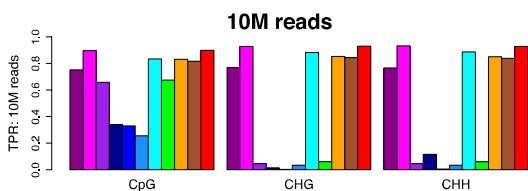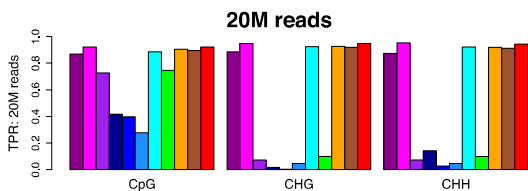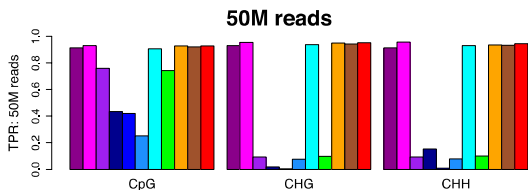

# Supplementary Figure 6 (continued)

## Dataset A

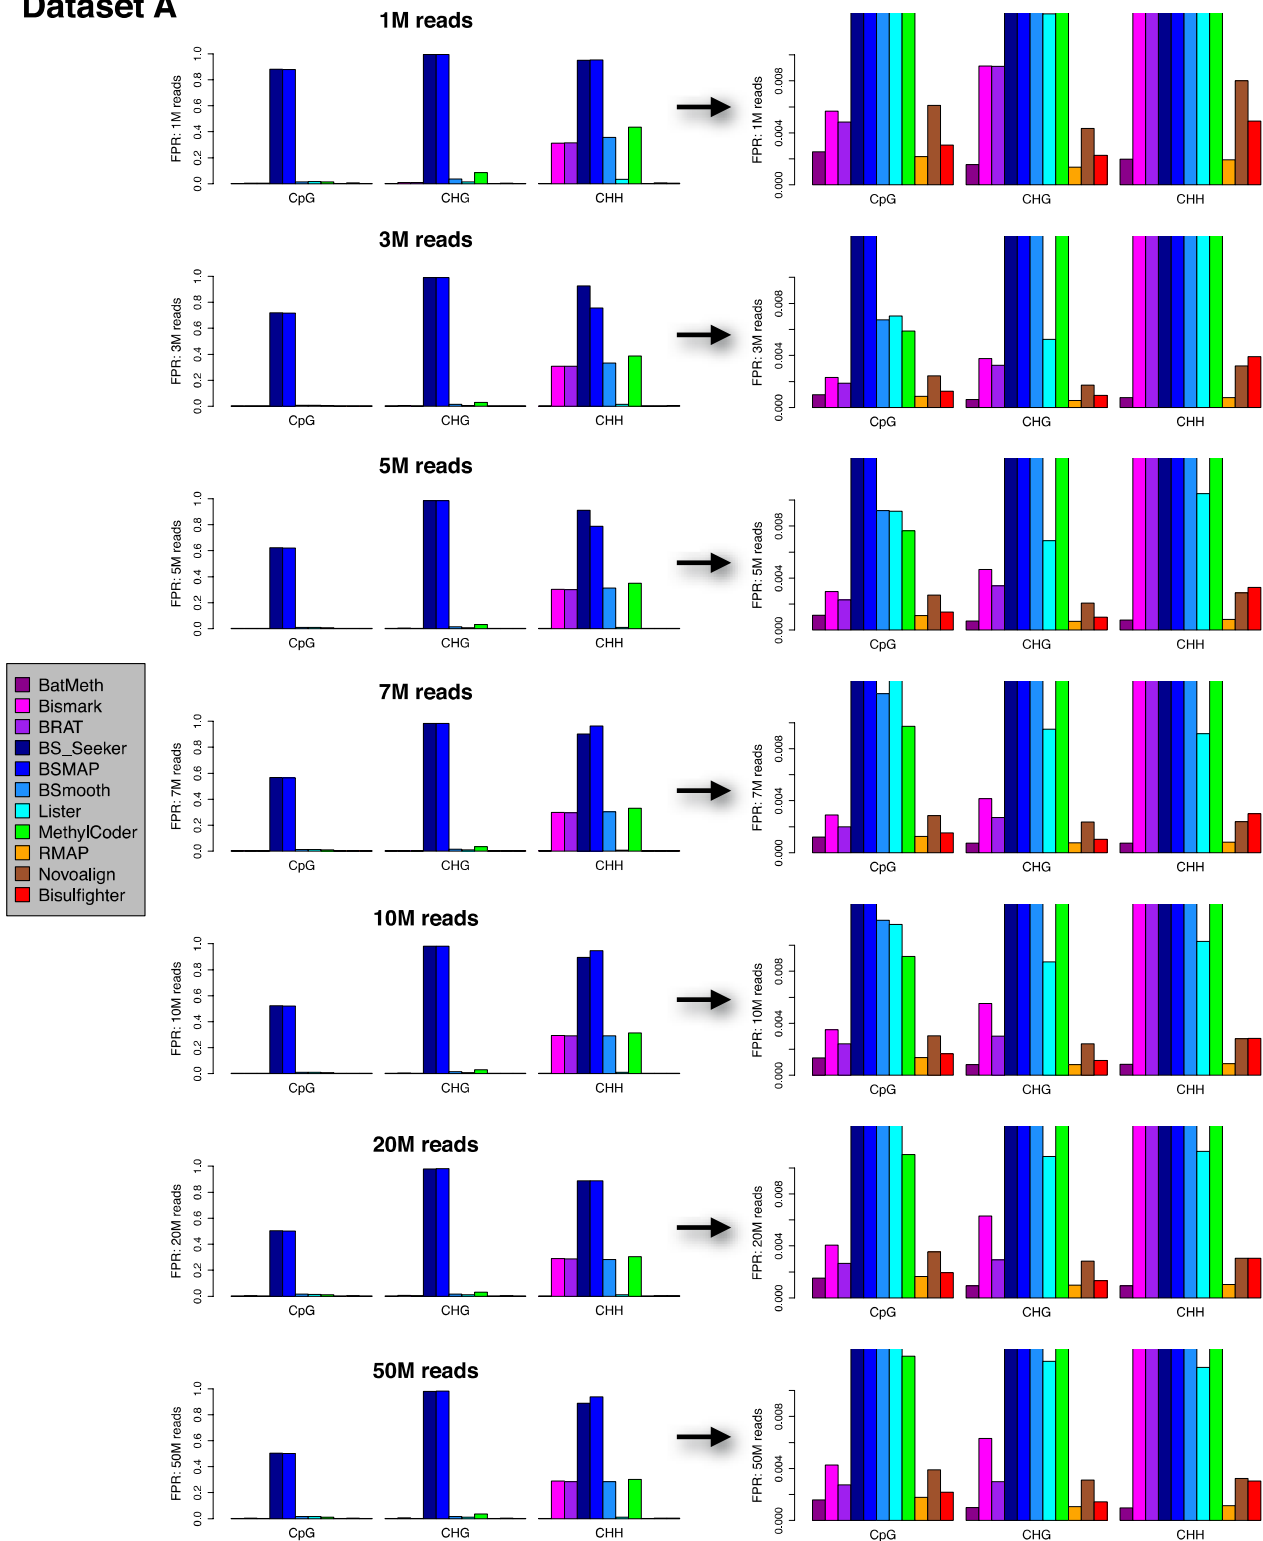

# Supplementary Figure 6 (continued)

## Dataset B

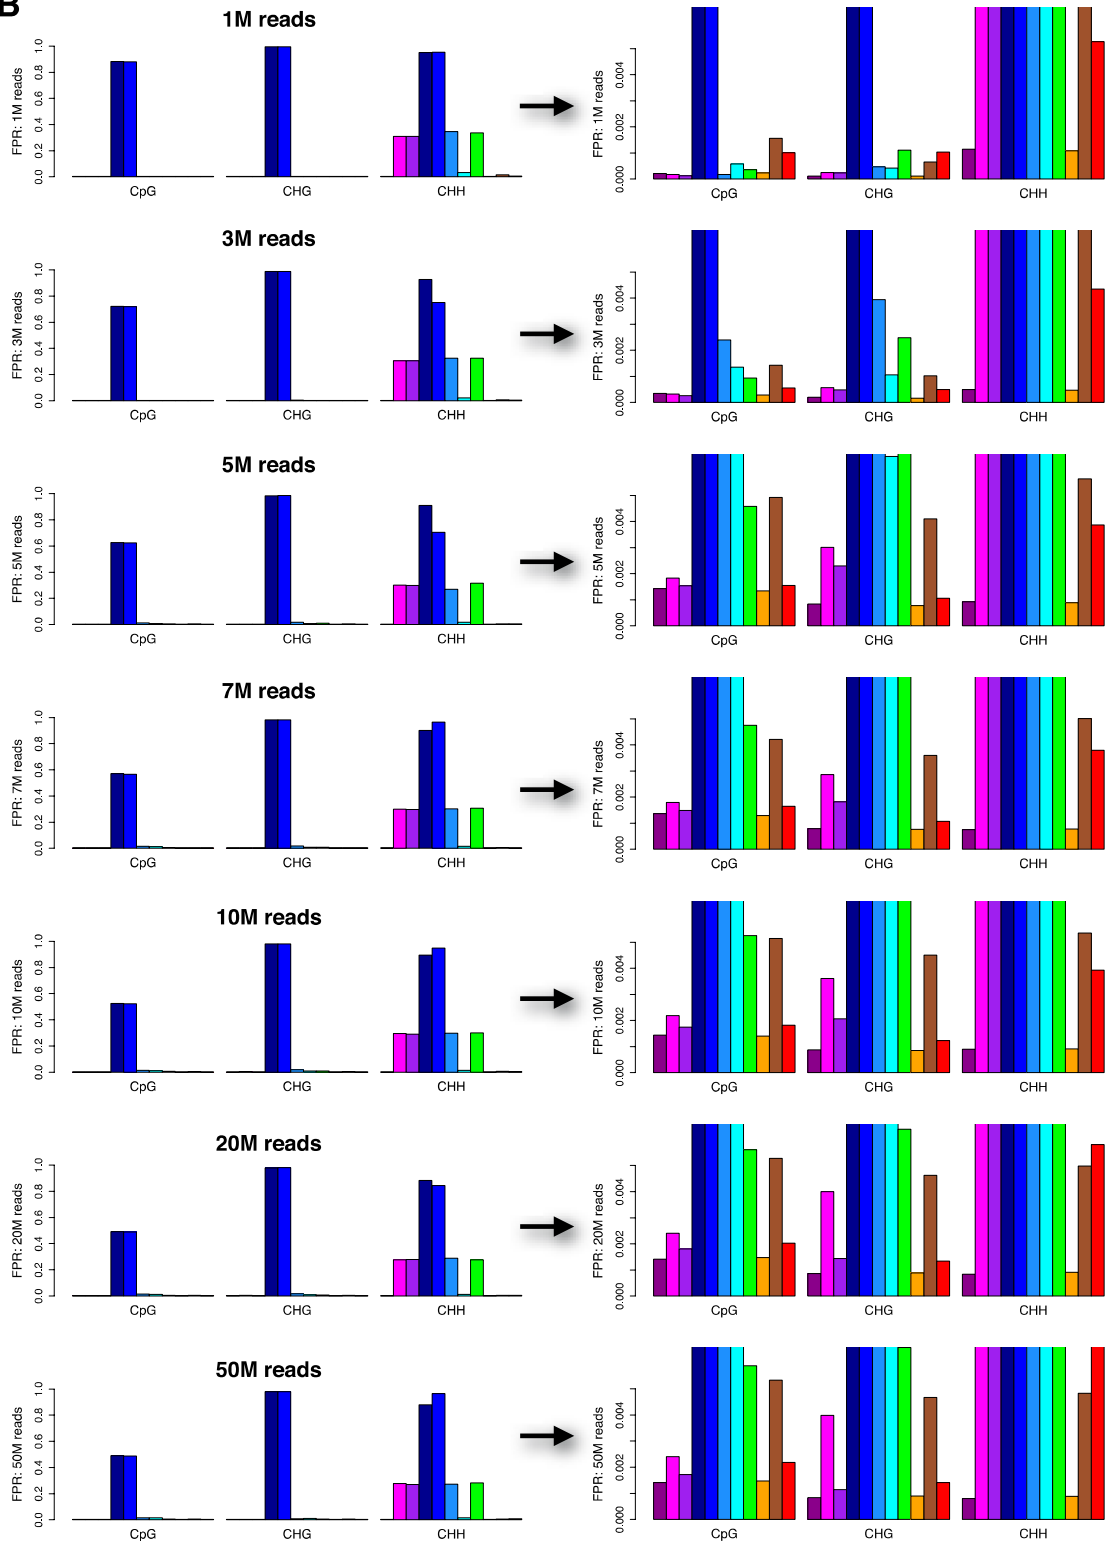

# Supplementary Figure 7

## Dataset A

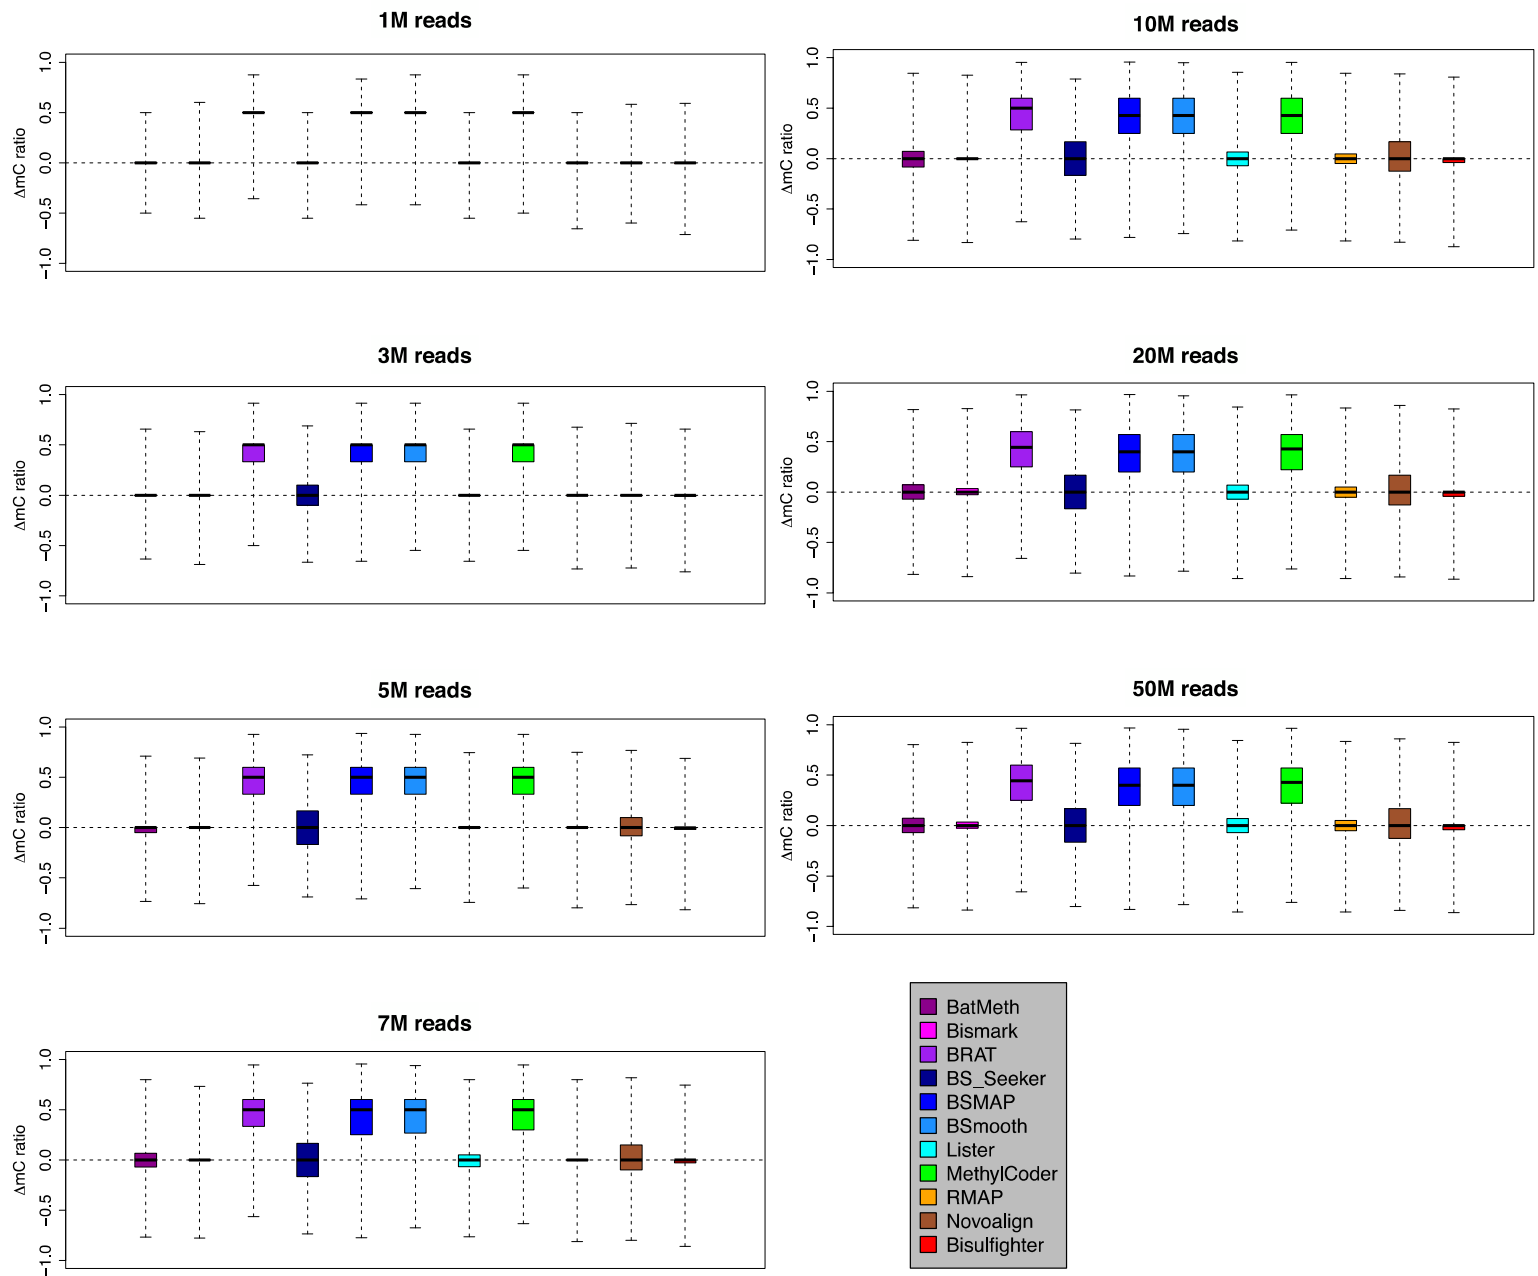

# Supplementary Figure 7 (continued)

## Dataset B

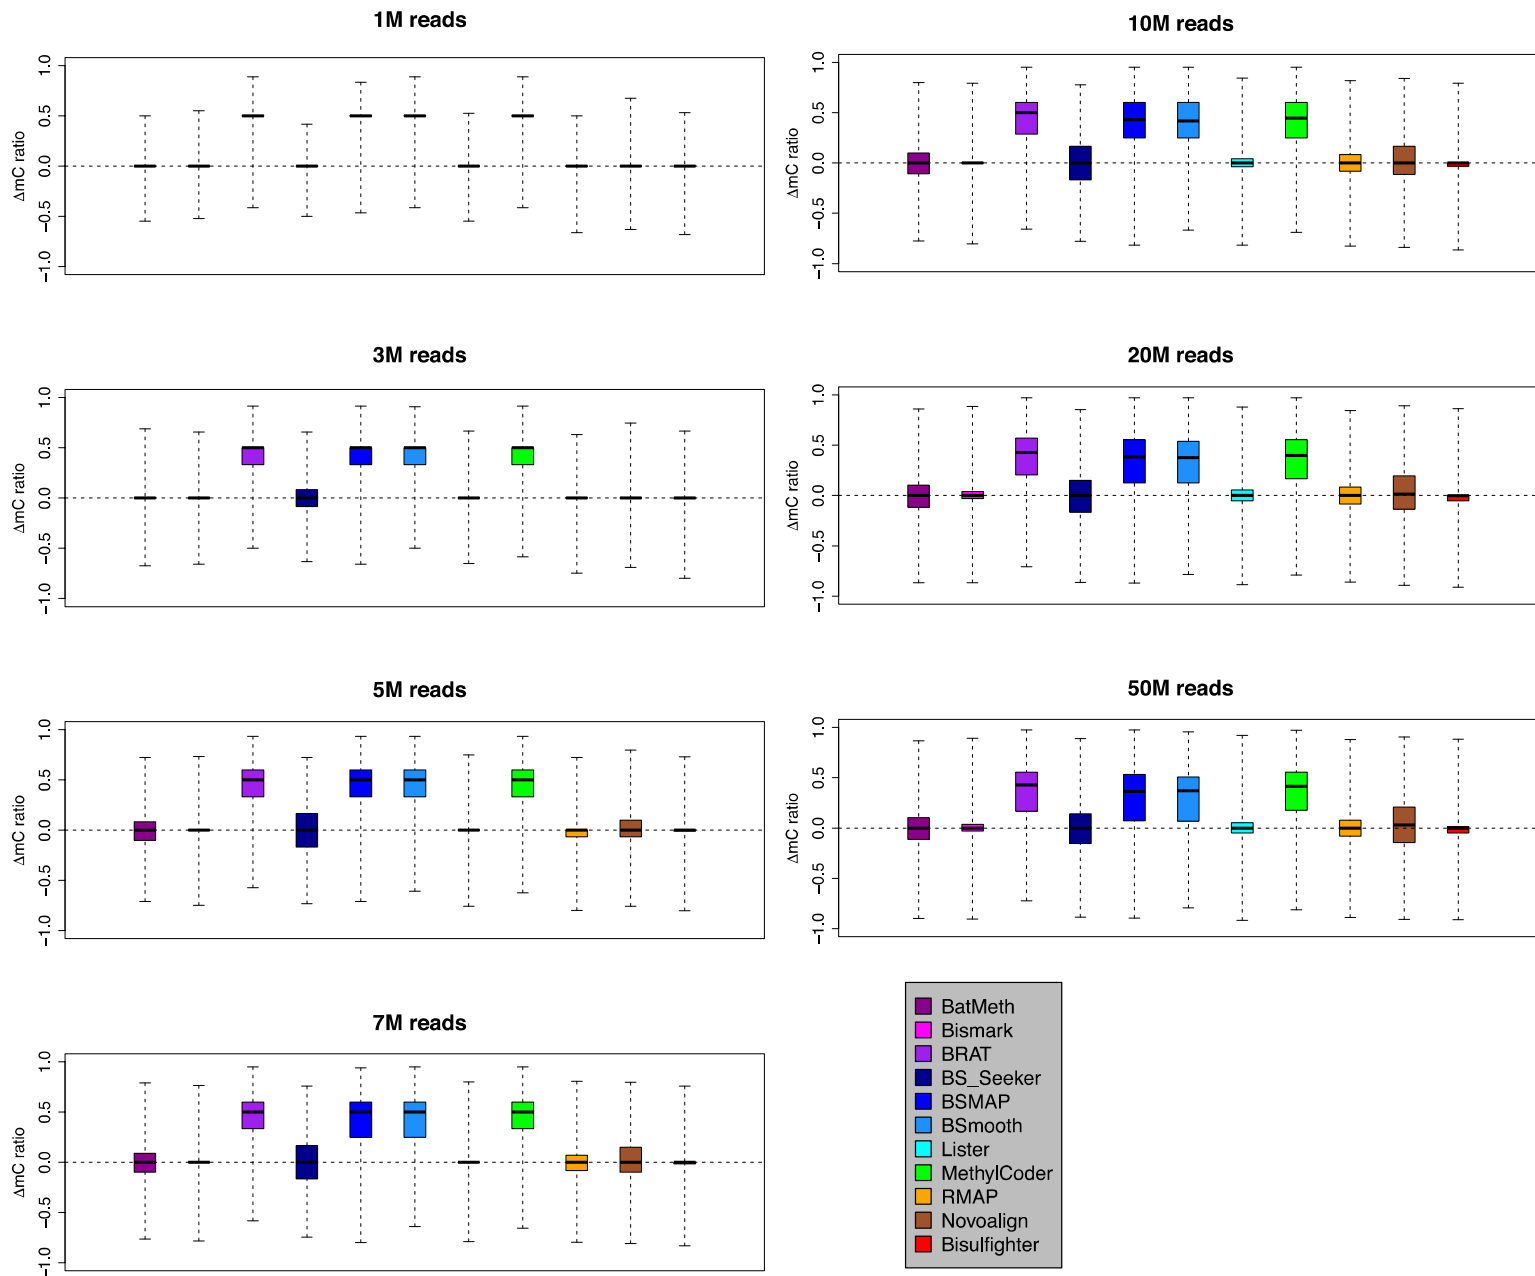

Ind.

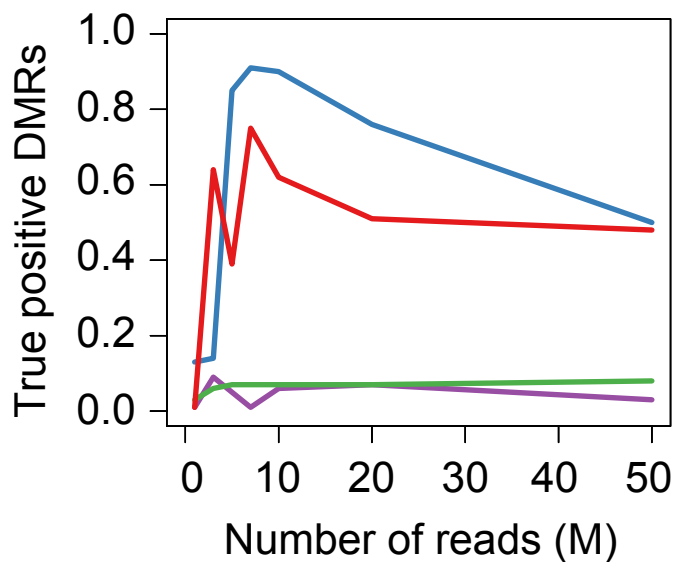

50 bp

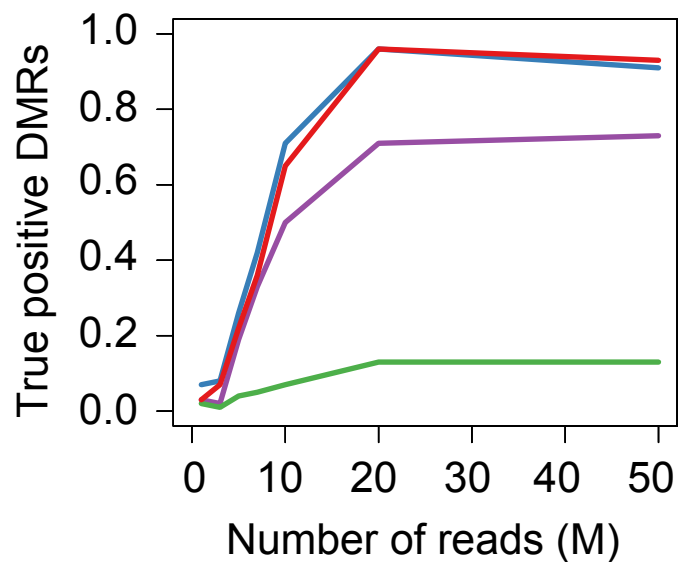

500 bp

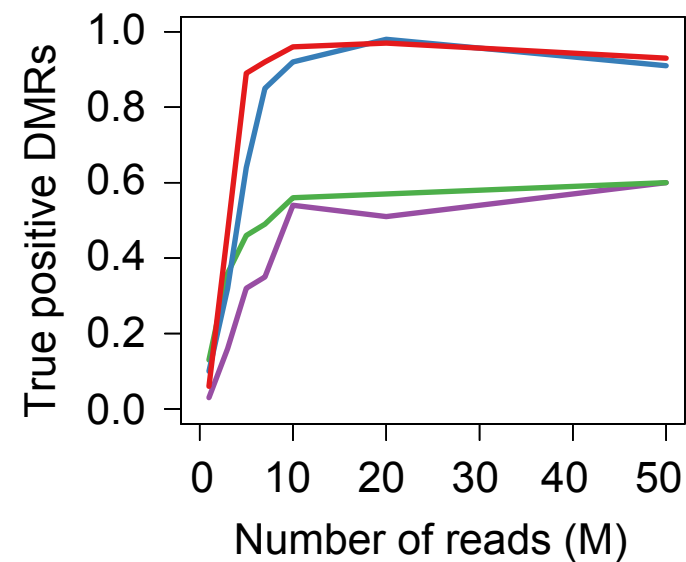

5 kbp

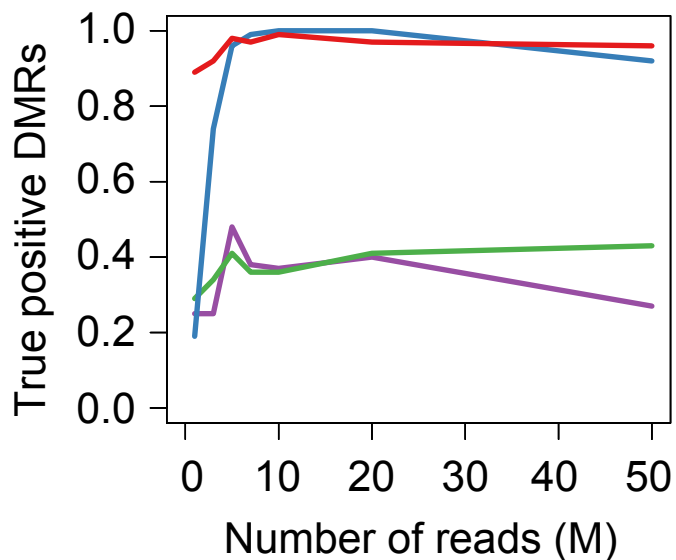

50 kbp

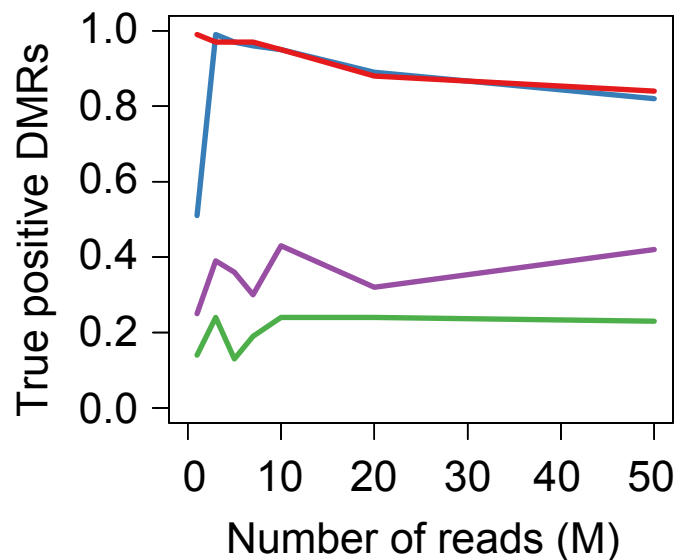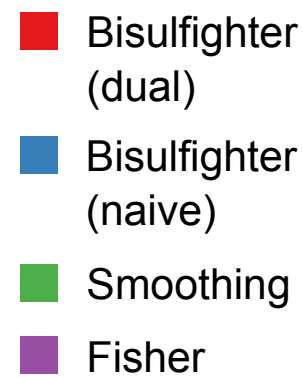

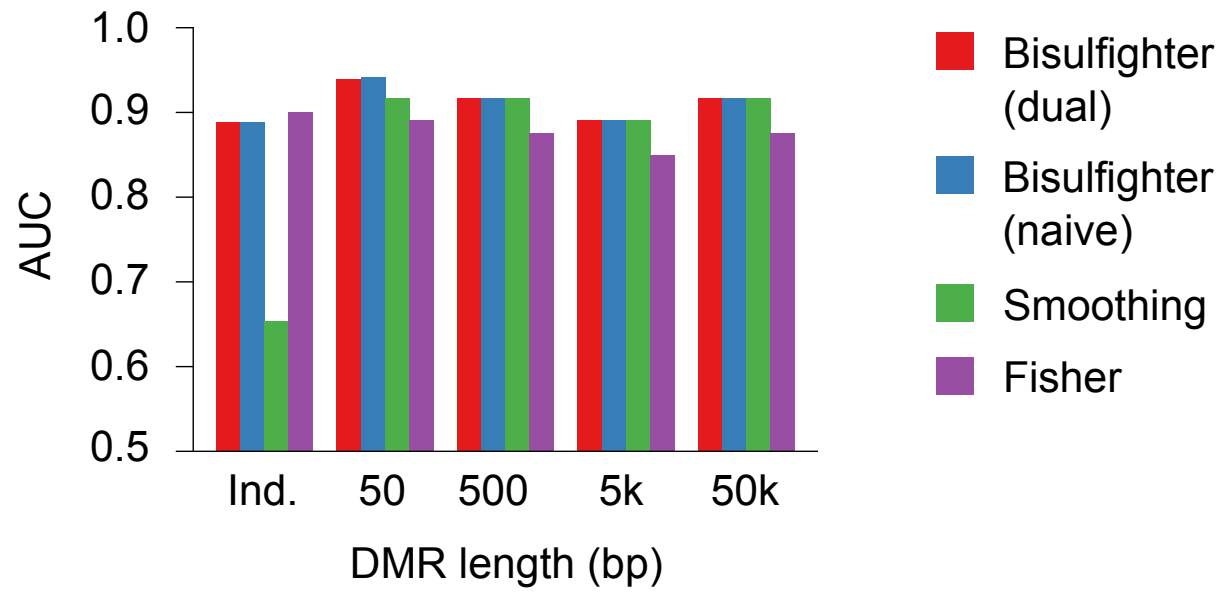

# Supplementary Figure 10

**a**

Sample = 3M reads

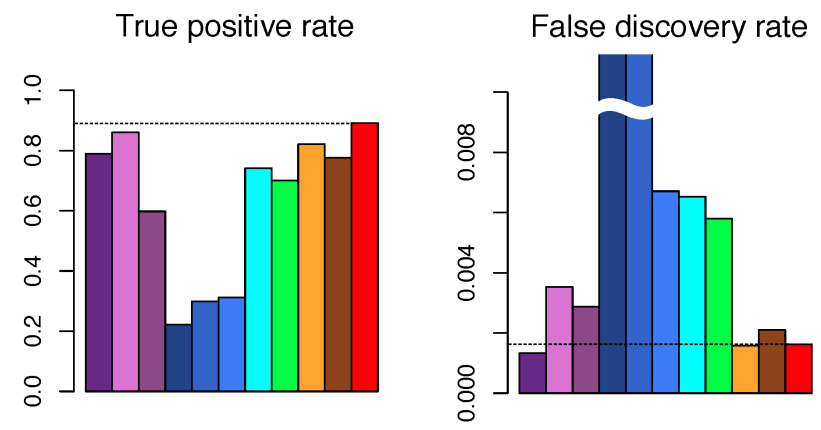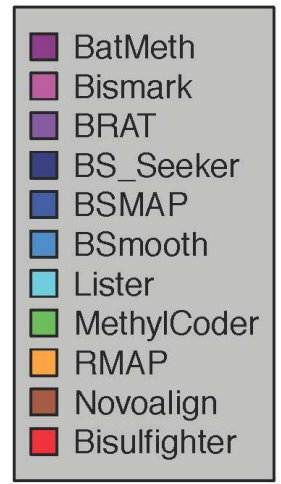

**b**

Sample = 20M reads

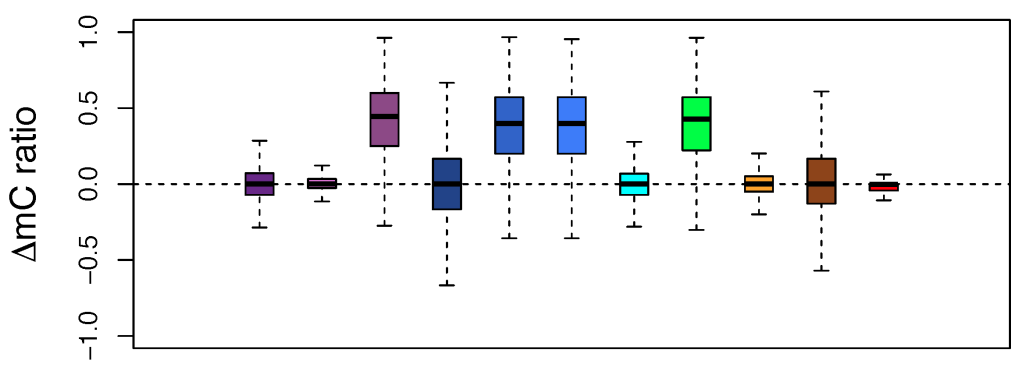

**c**

50% overlap

90% overlap

99% overlap

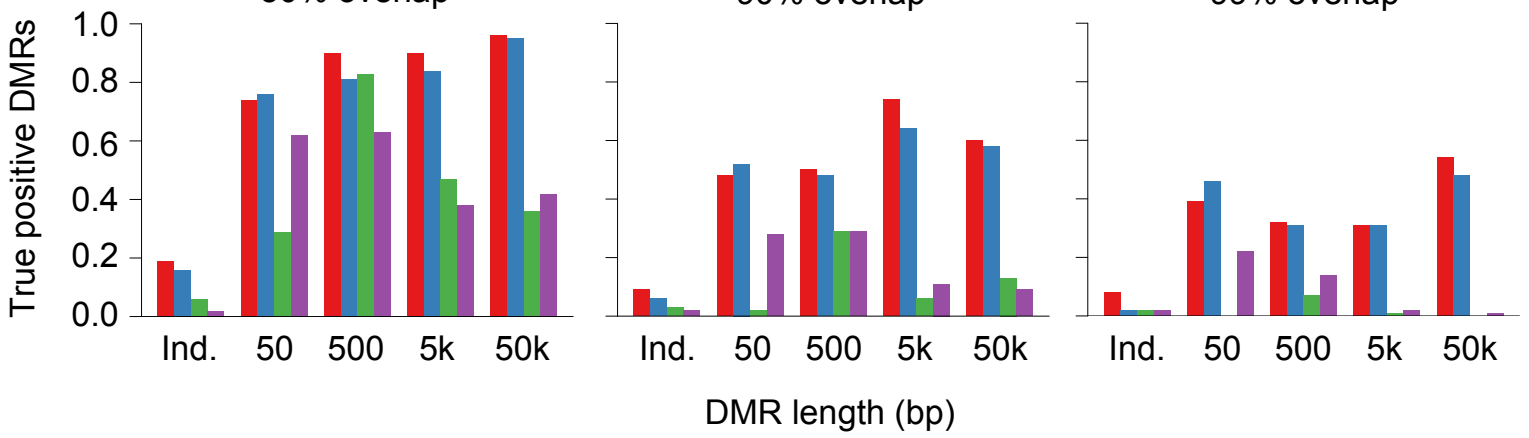



# Supplementary Figure 11

Top 1000 DMRs, Carcinogenesis

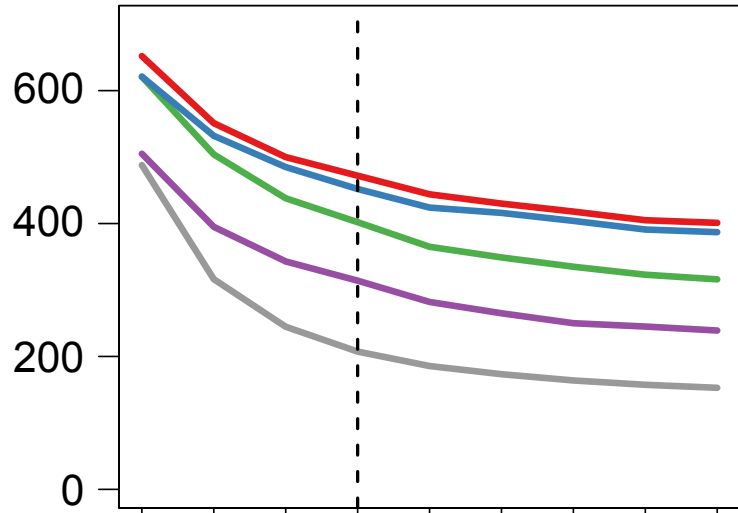

Top 1000 DMRs, Adipogenesis

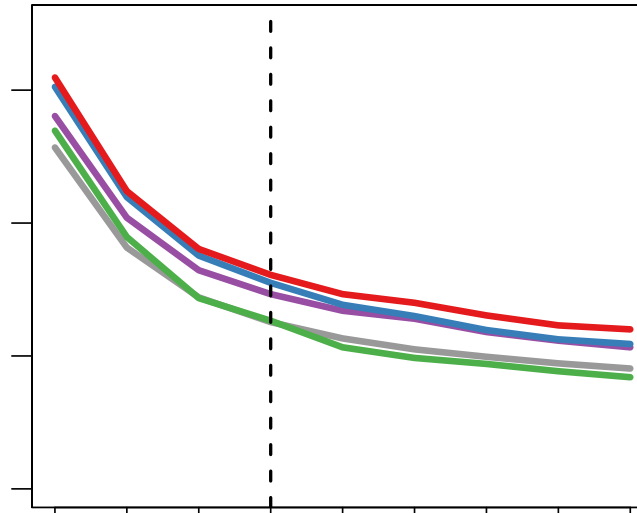

- Bisulfighter (dual)
- Bisulfighter (naive)
- Smoothing
- Fisher
- Random guessing

Top 3000 DMRs, Carcinogenesis

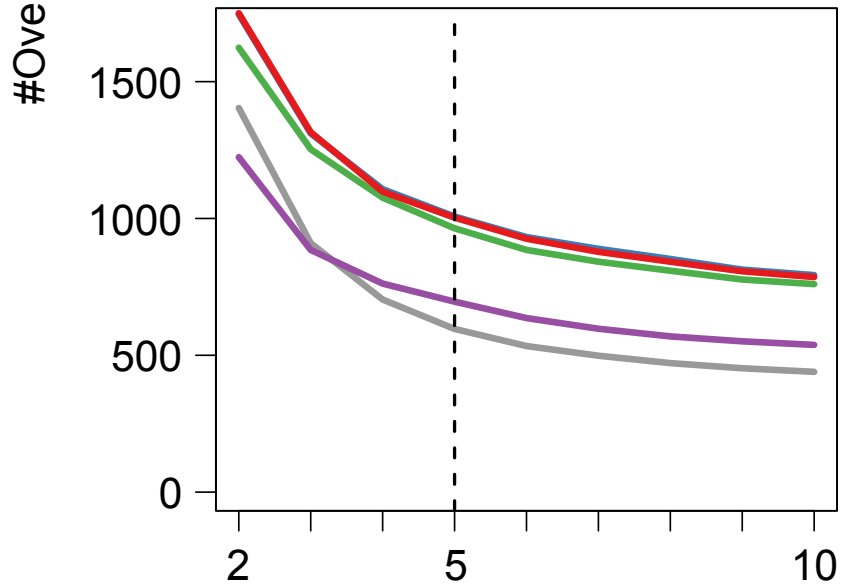

Top 3000 DMRs, Adipogenesis

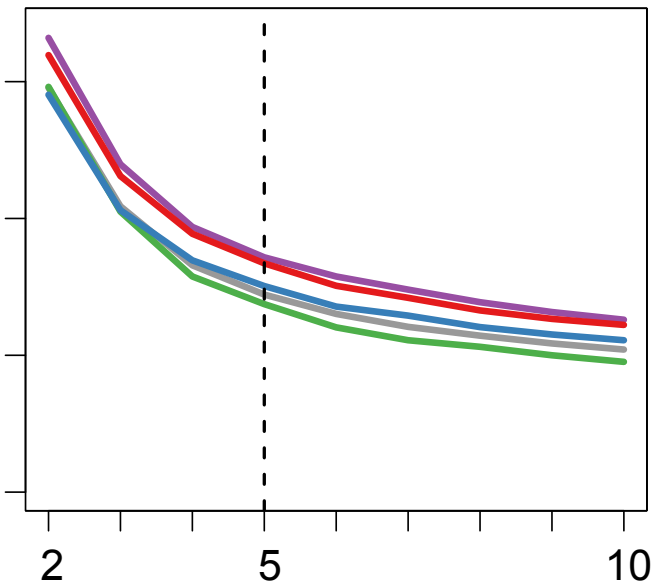

Threshold of expression fold change for defining DEGs

# Supplementary Figure 12

TSS-proximal, 500 bp window

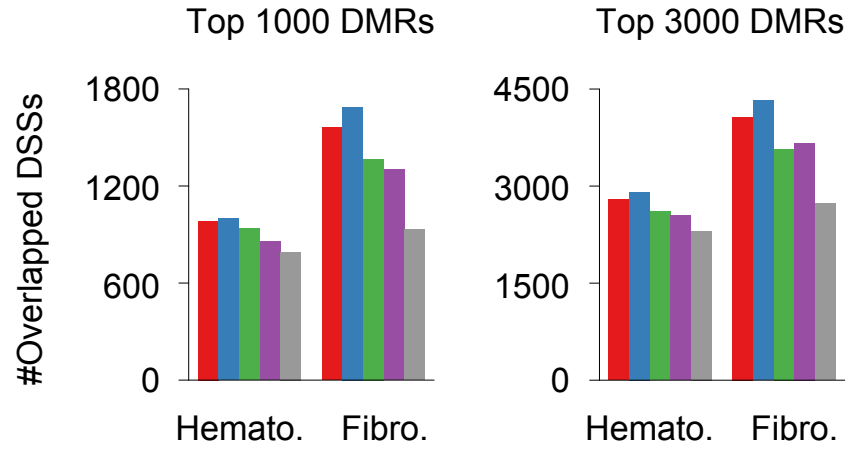

TSS-distal, 500 bp window

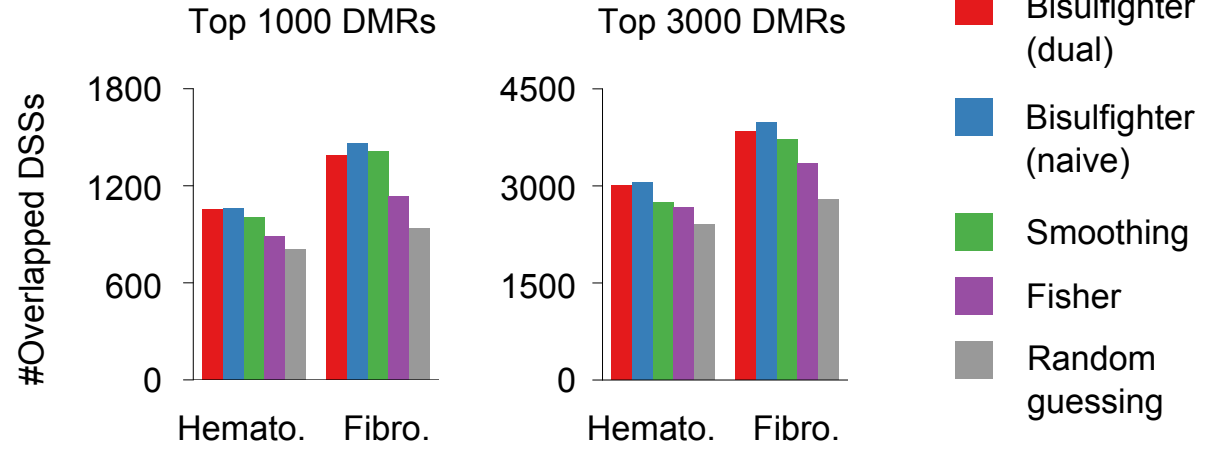

TSS-proximal, 5 kbp window

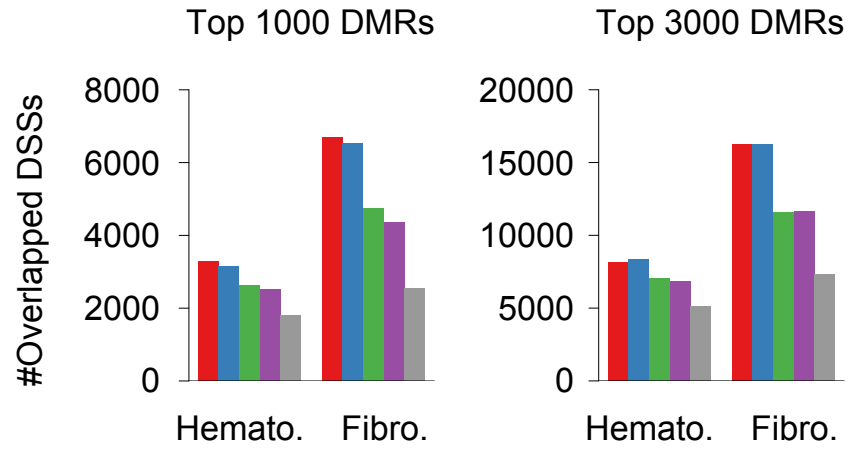

TSS-distal, 5 kbp window

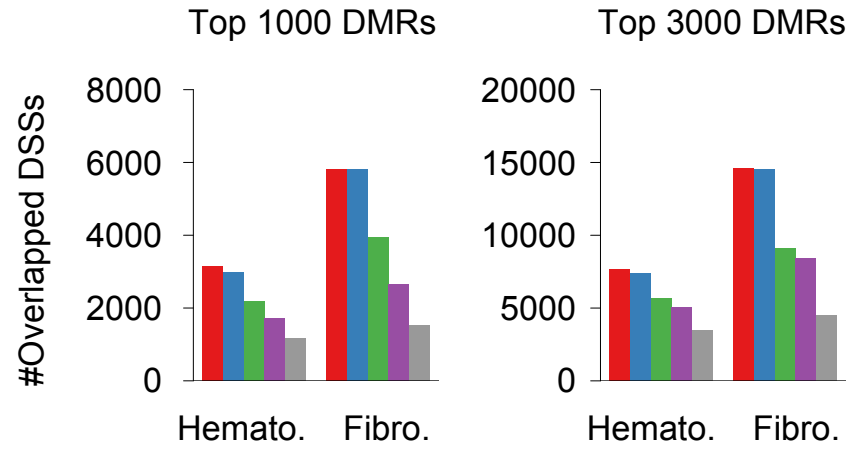

# Supplementary Figure 13

## Dataset A

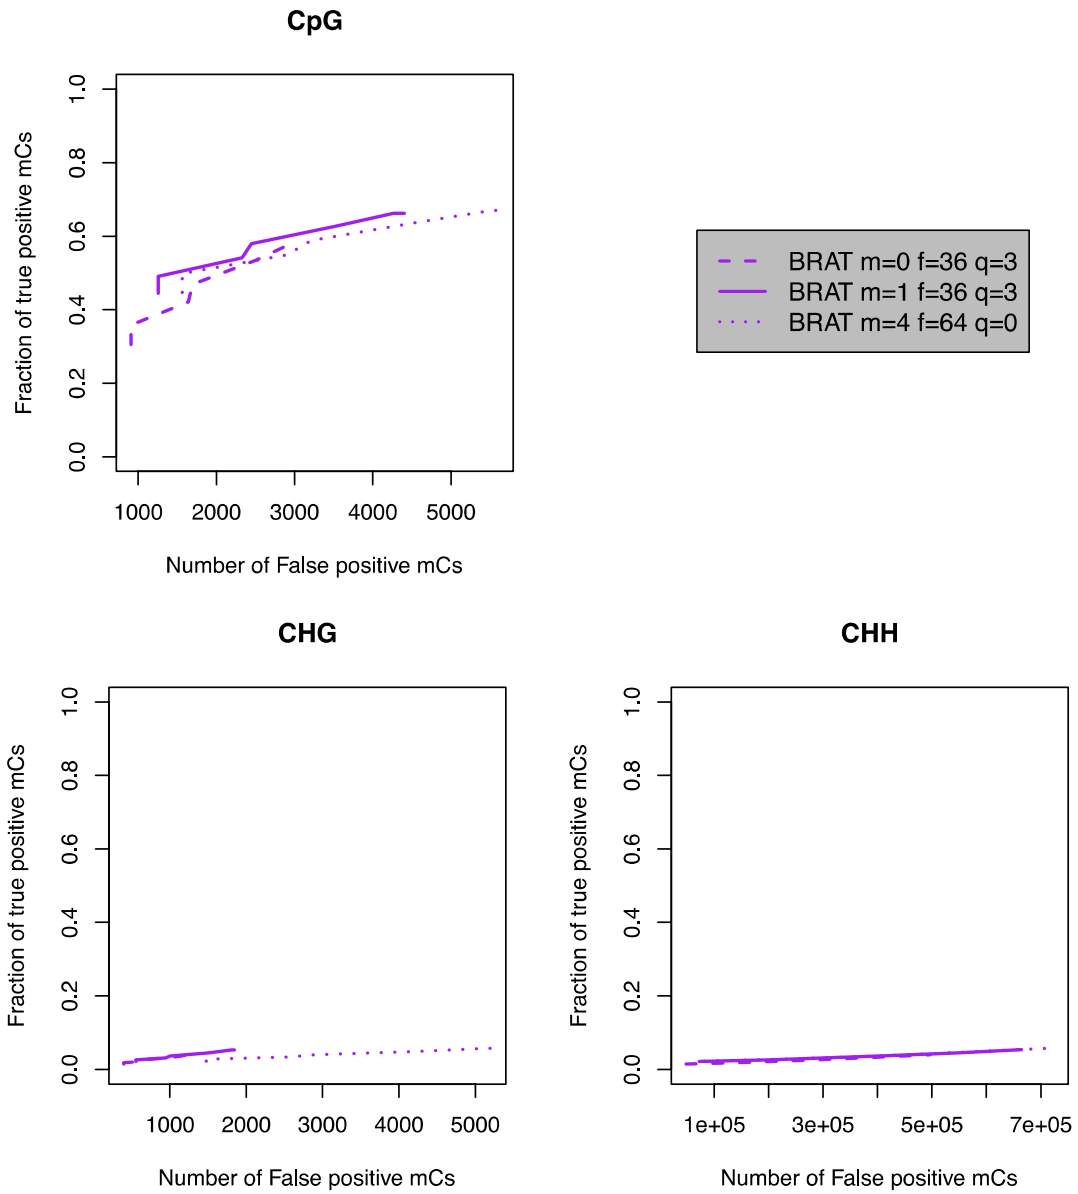

## Dataset B

CpG

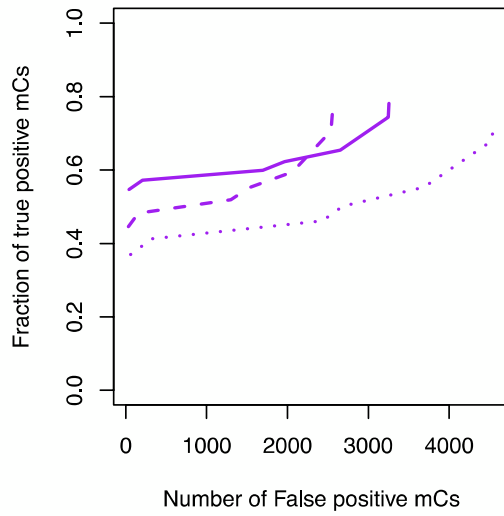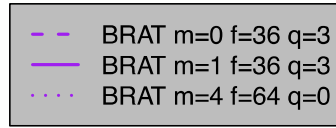

CHG

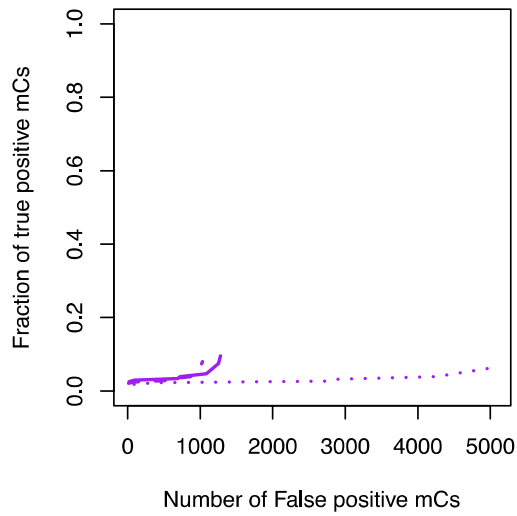

CHH

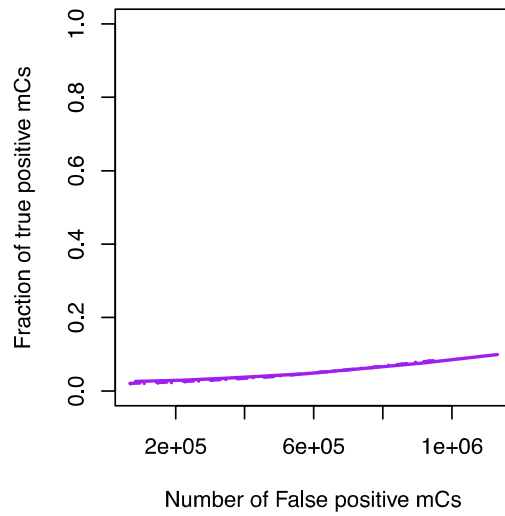

# Supplementary Figure 13 (continued)

## Dataset A

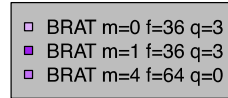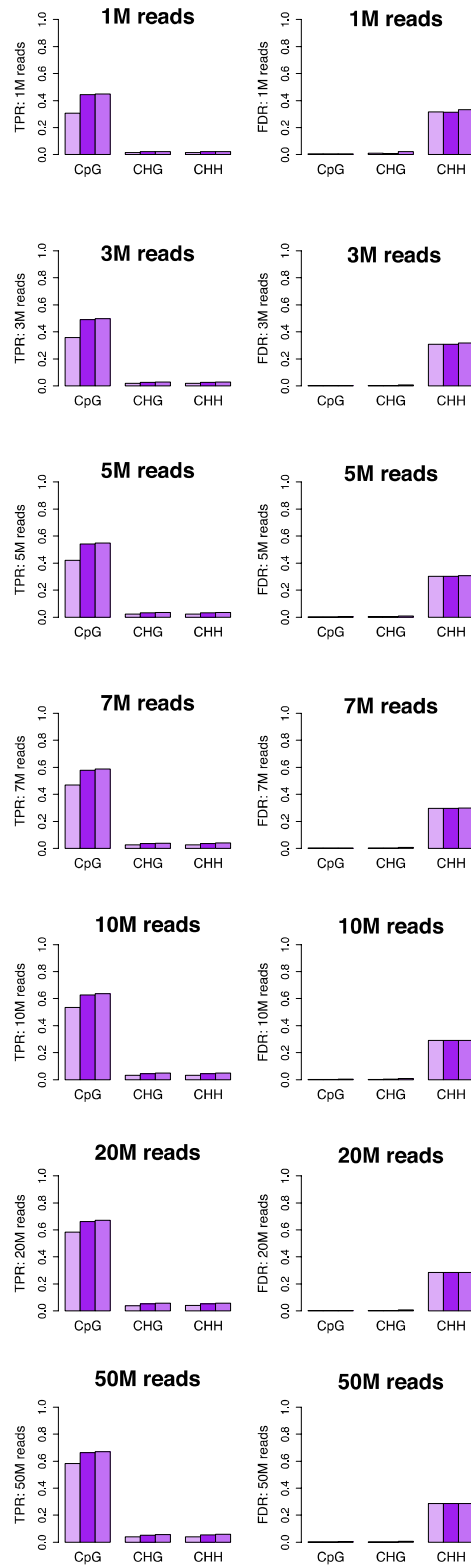

# Supplementary Figure 13 (continued)

## Dataset B

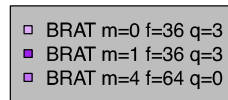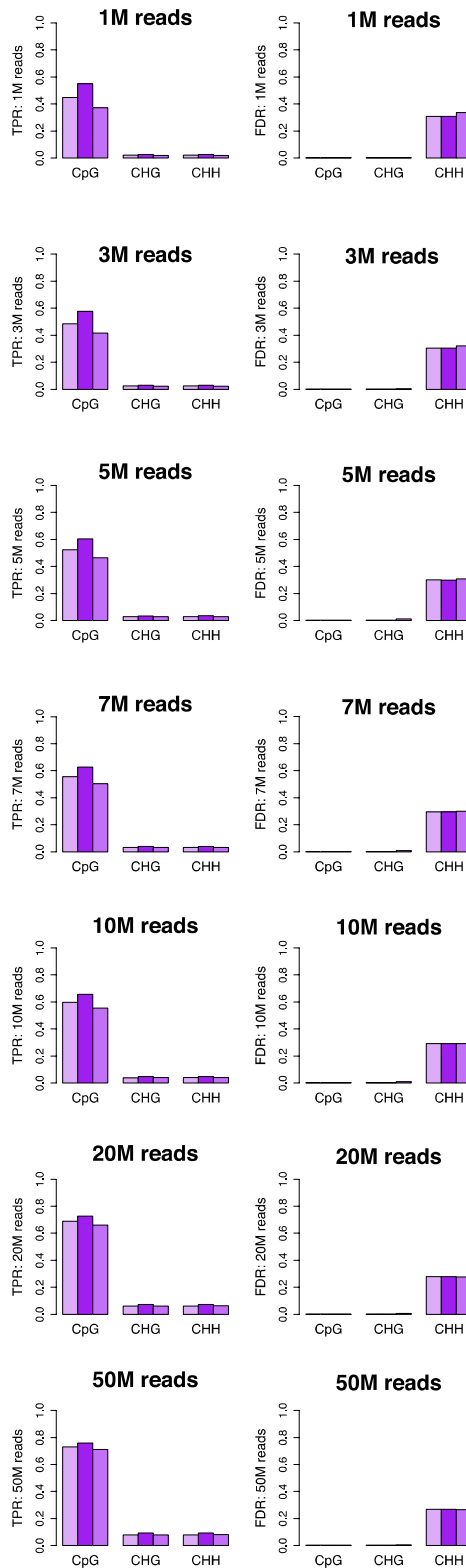

# Supplementary Figure 13 (continued)

## Dataset A

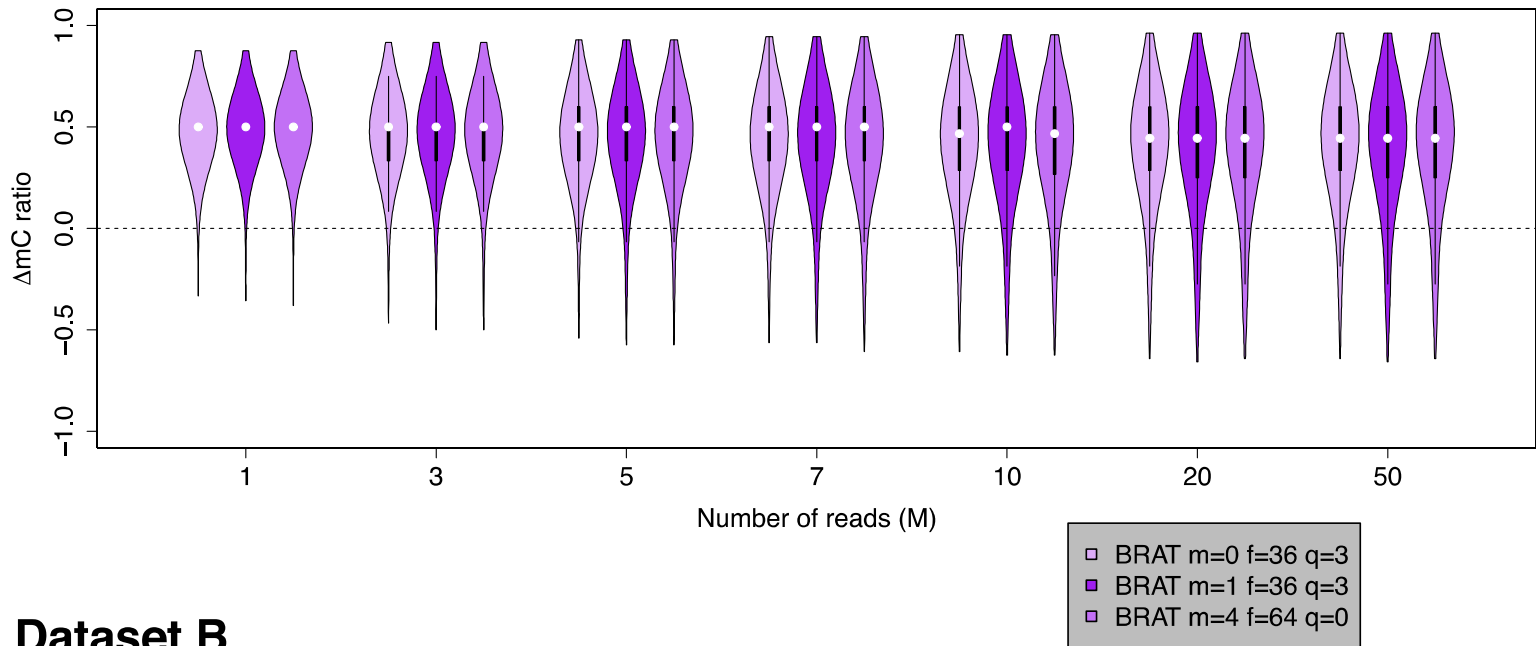

## Dataset B

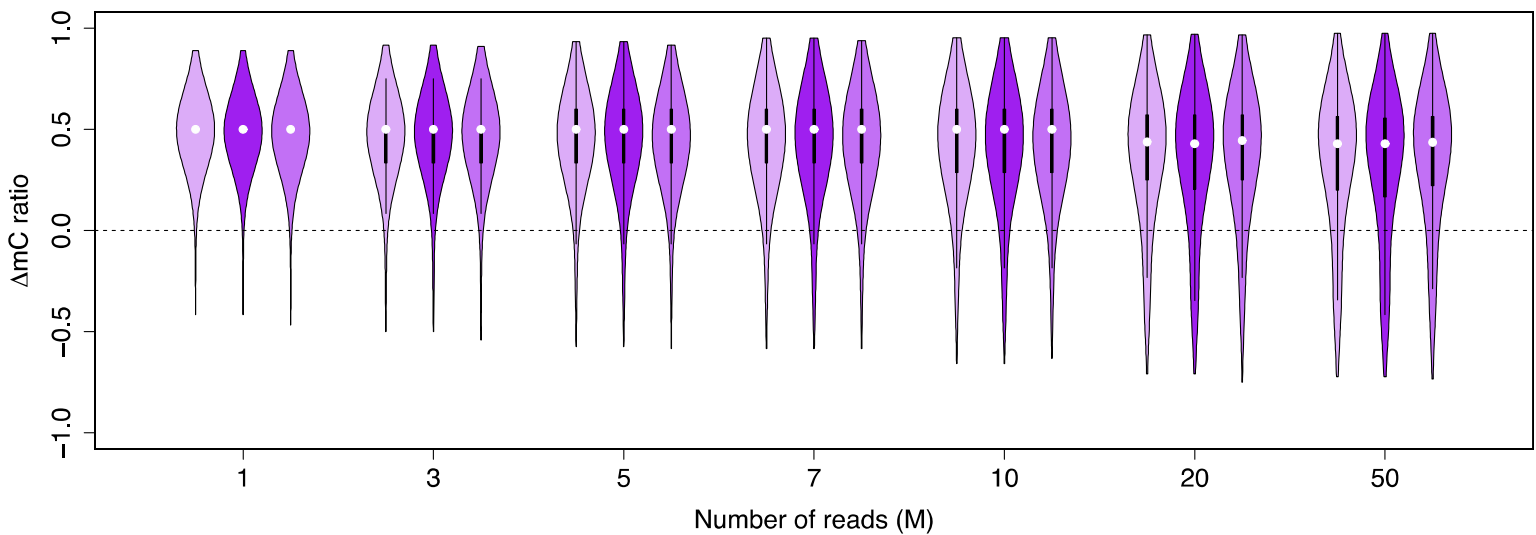

## Dataset A

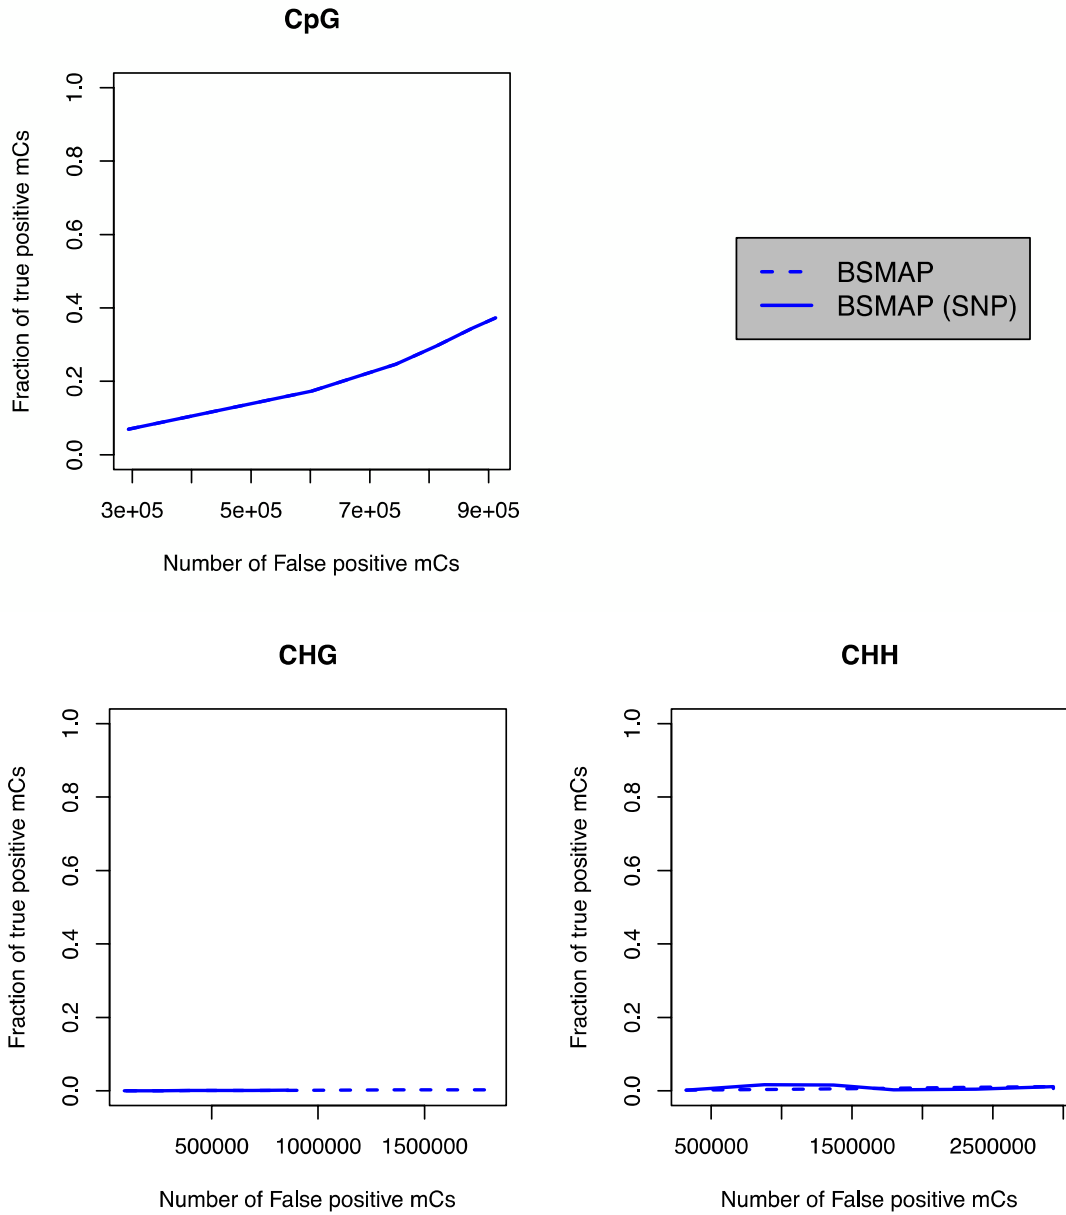



# Supplementary Figure 14 (continued)

## Dataset B

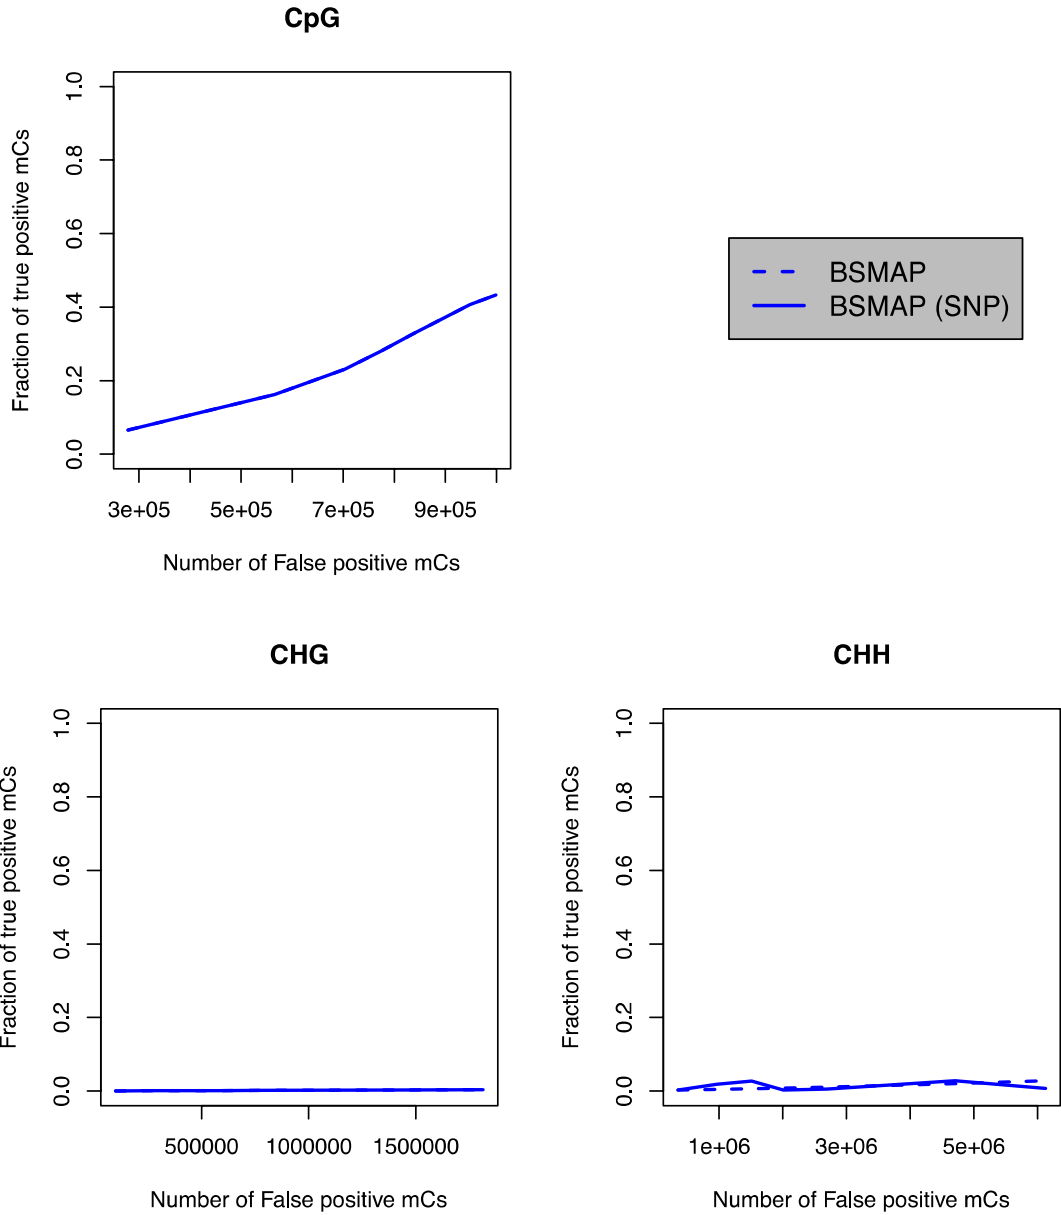

# Supplementary Figure 14 (continued)

## Dataset A

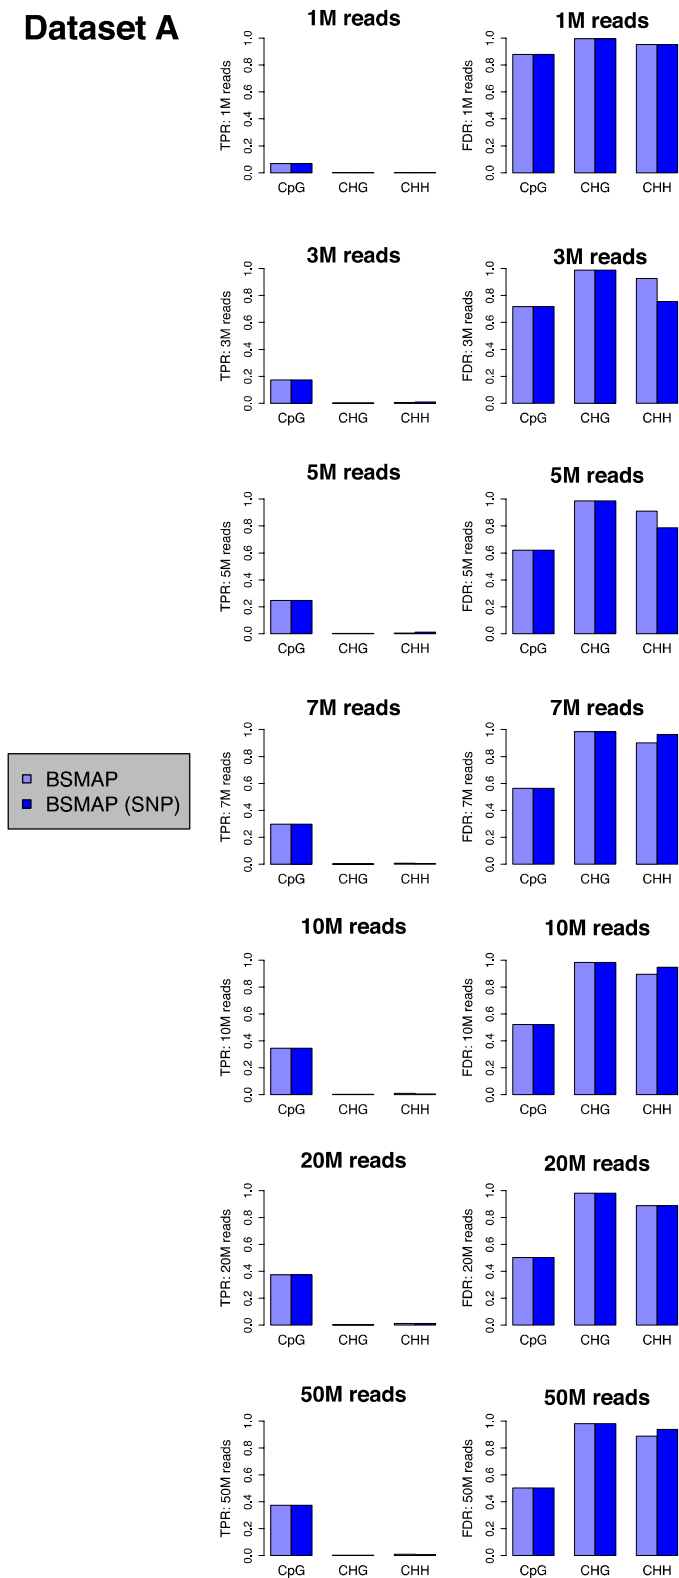

# Supplementary Figure 14 (continued)

## Dataset B

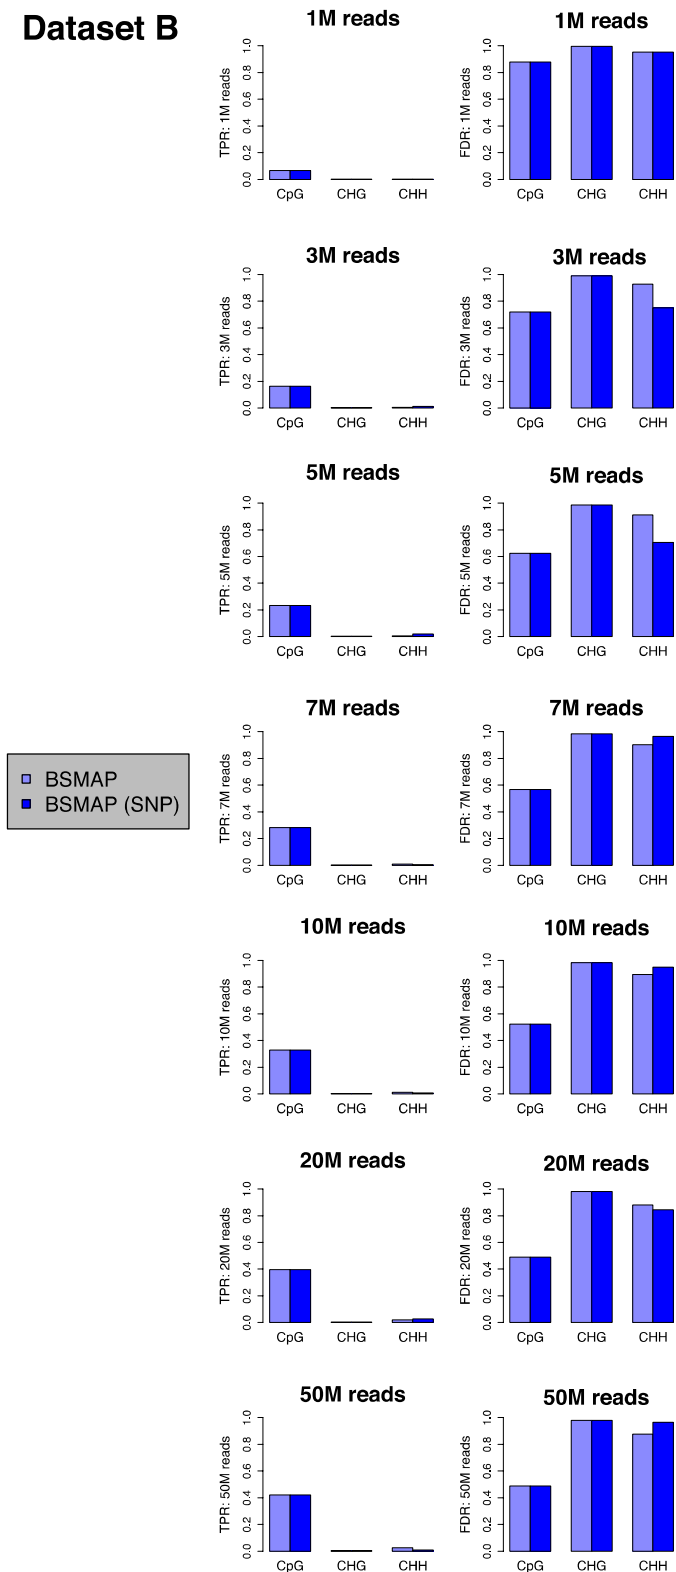

# Supplementary Figure 14 (continued)

## Dataset A

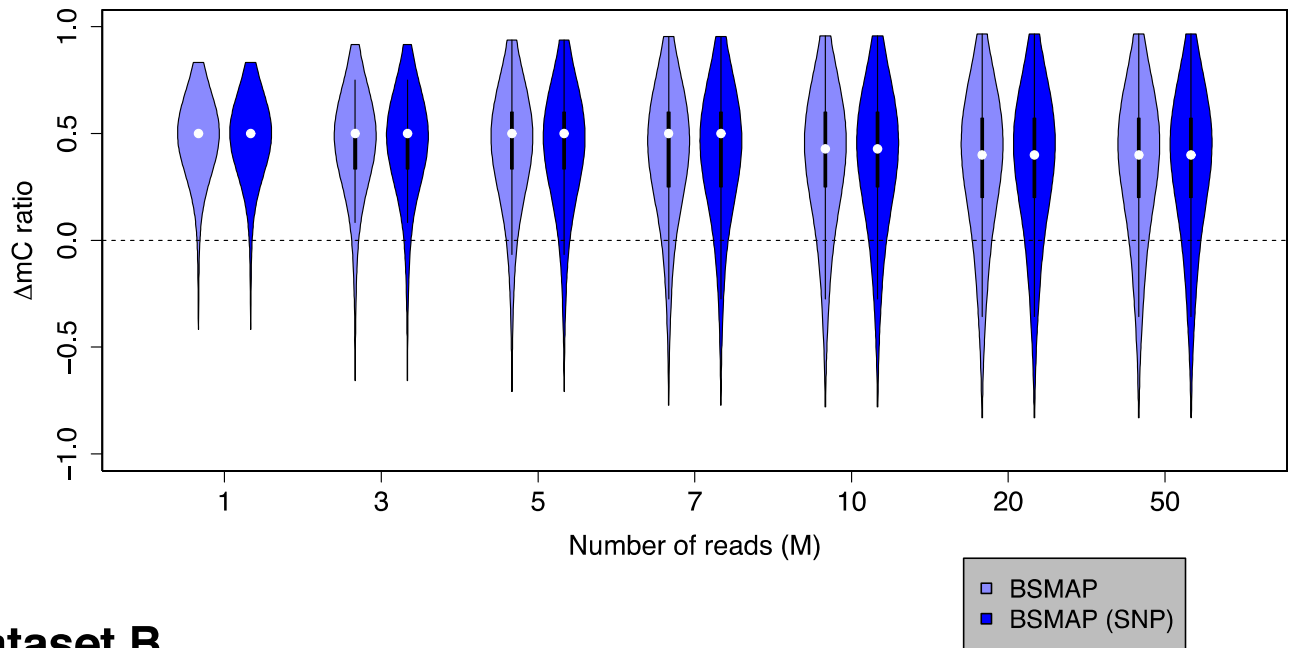

## Dataset B

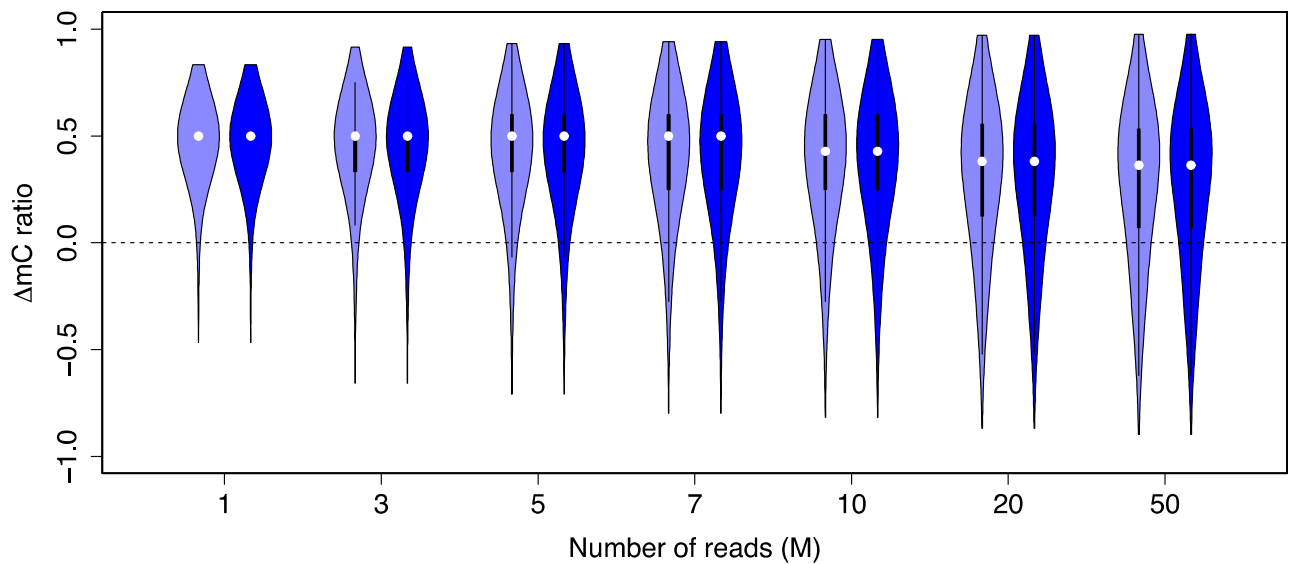

# Supplementary Figure 15

## Dataset A

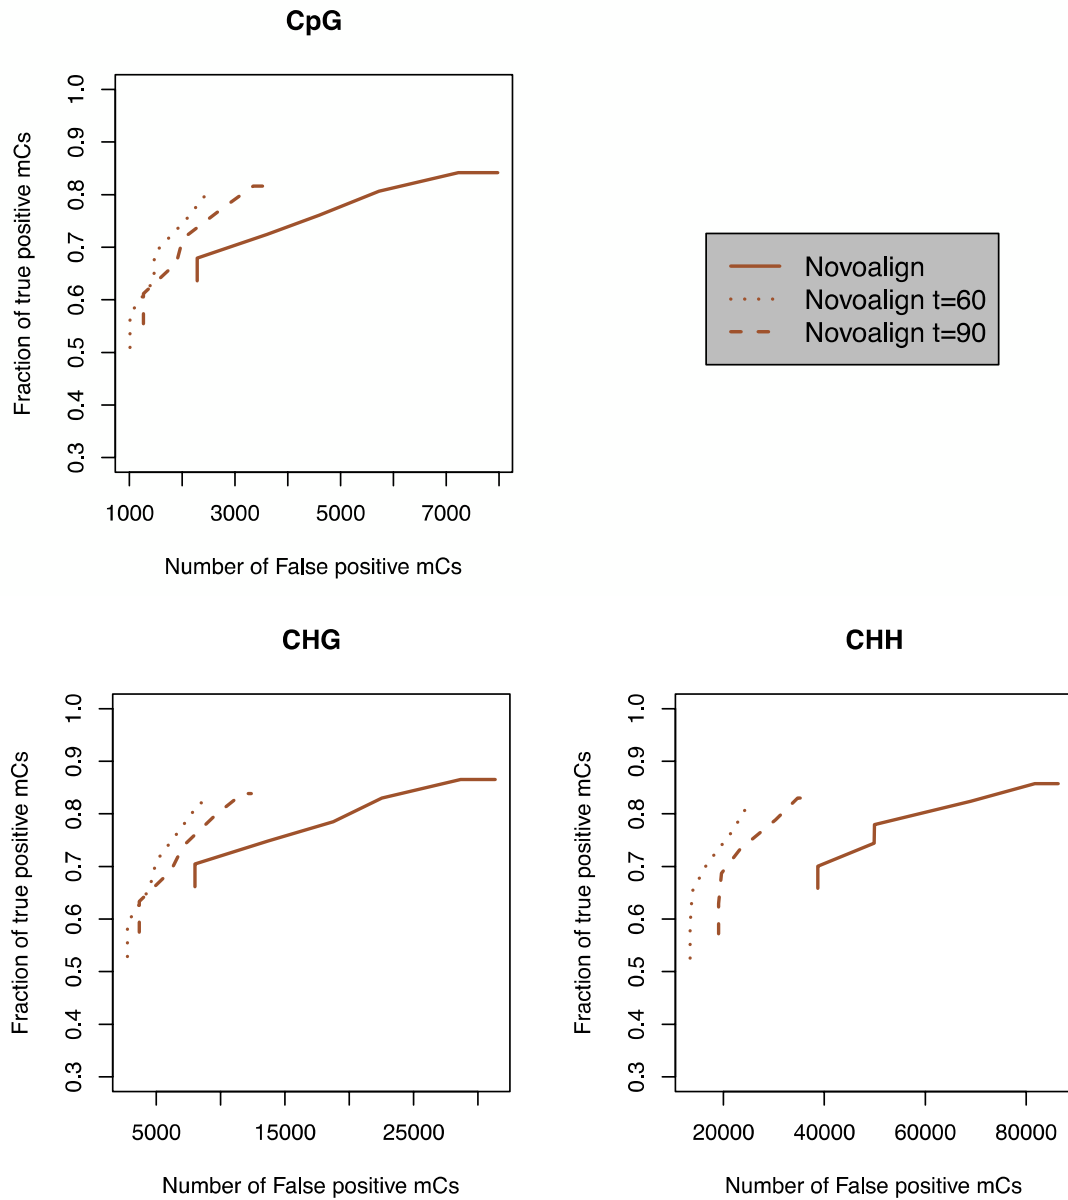

# Supplementary Figure 15 (continued)

## Dataset B

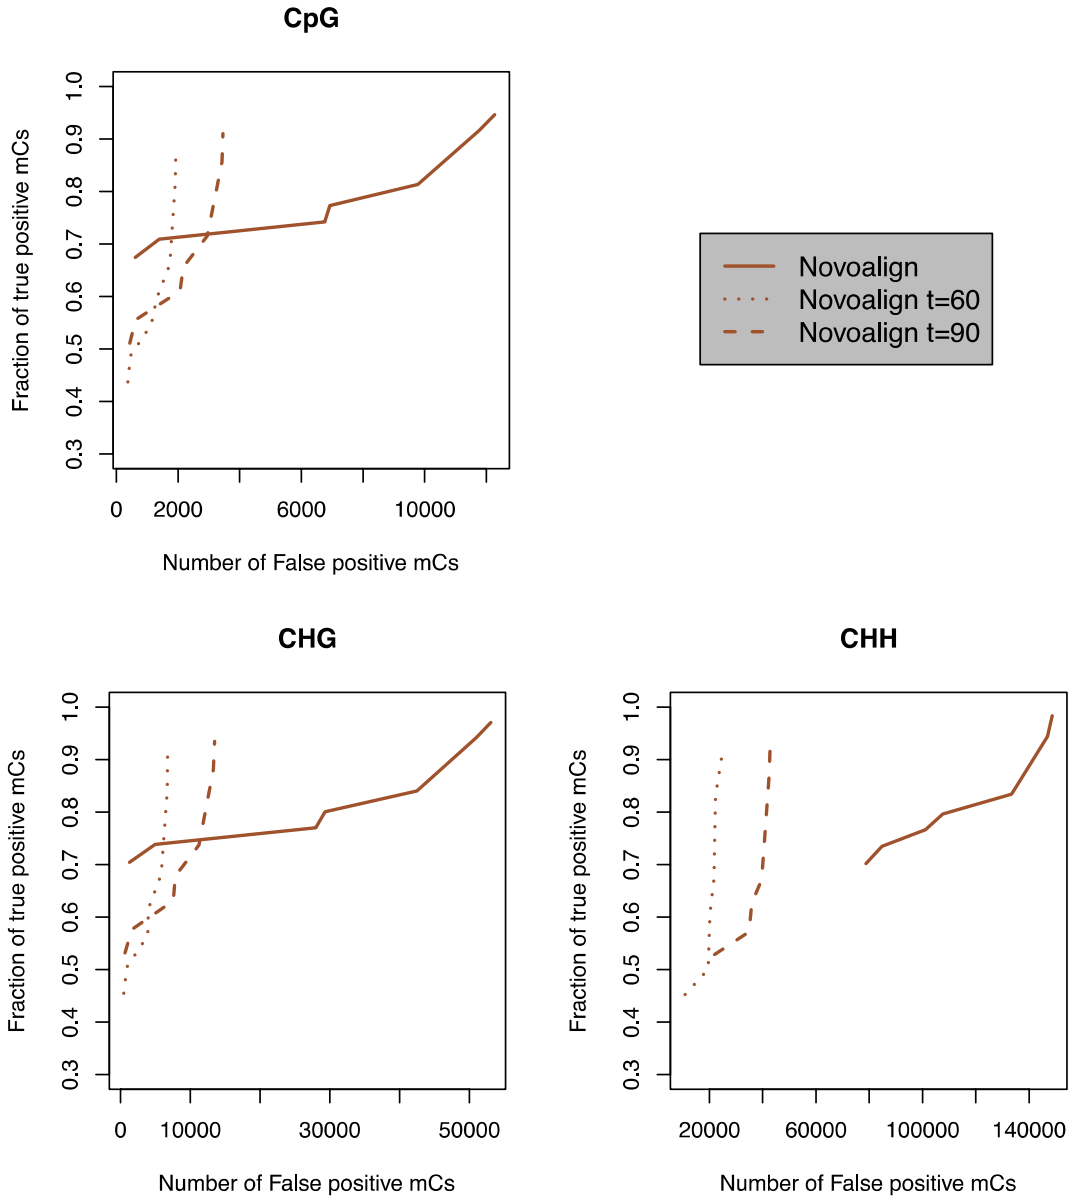

# Supplementary Figure 15 (continued)

## Dataset A

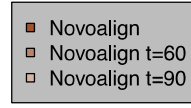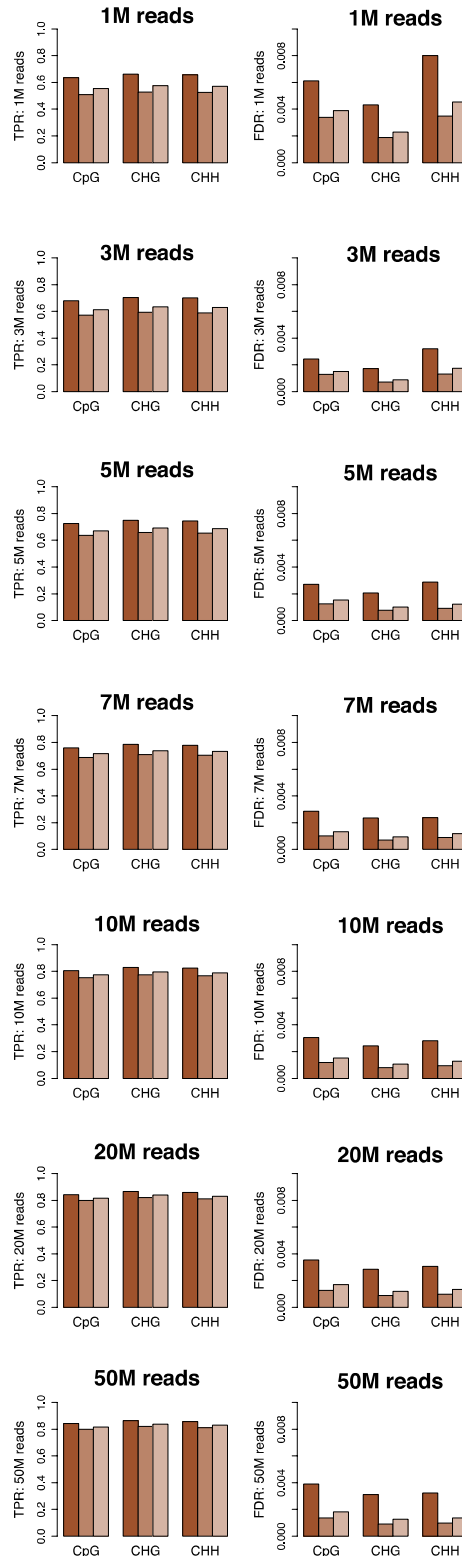

# Supplementary Figure 15 (continued)

## Dataset B

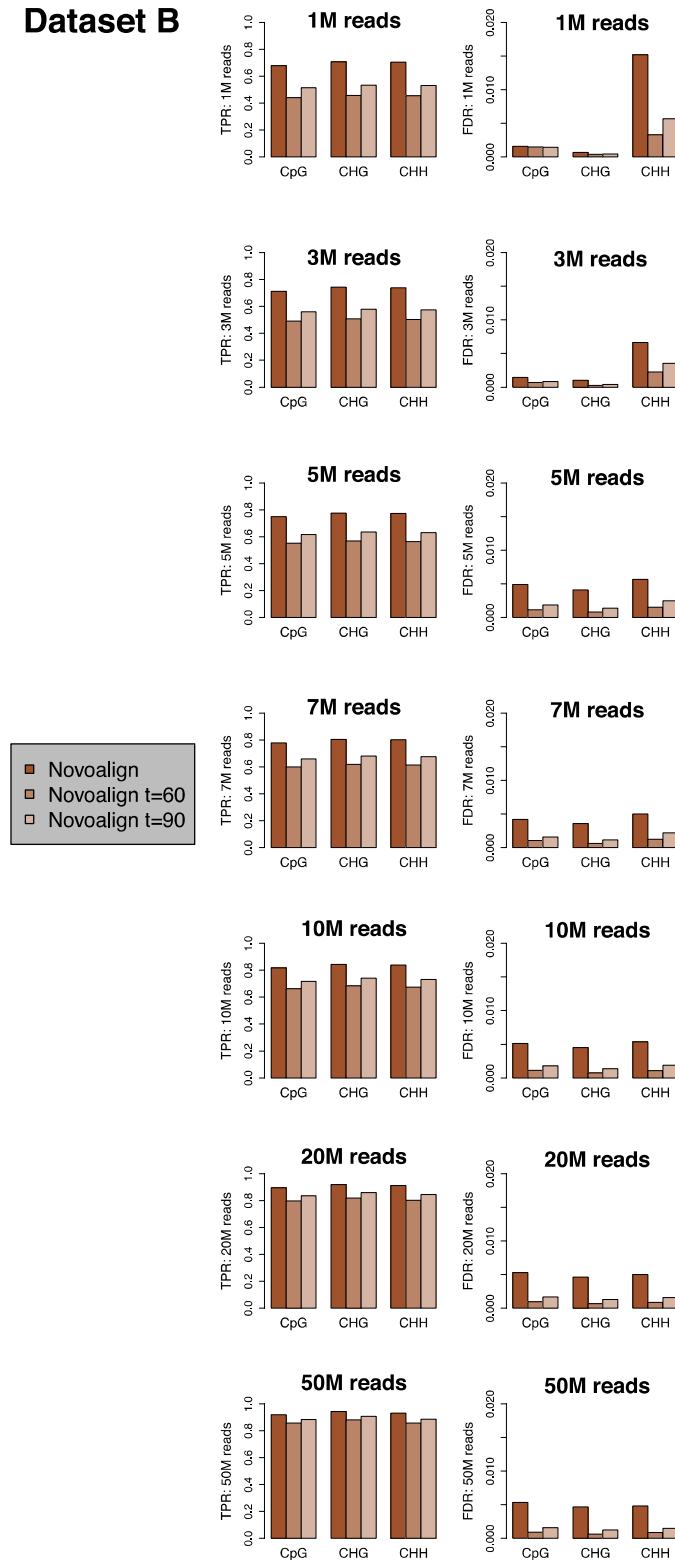



# Supplementary Figure 15 (continued)

## Dataset A

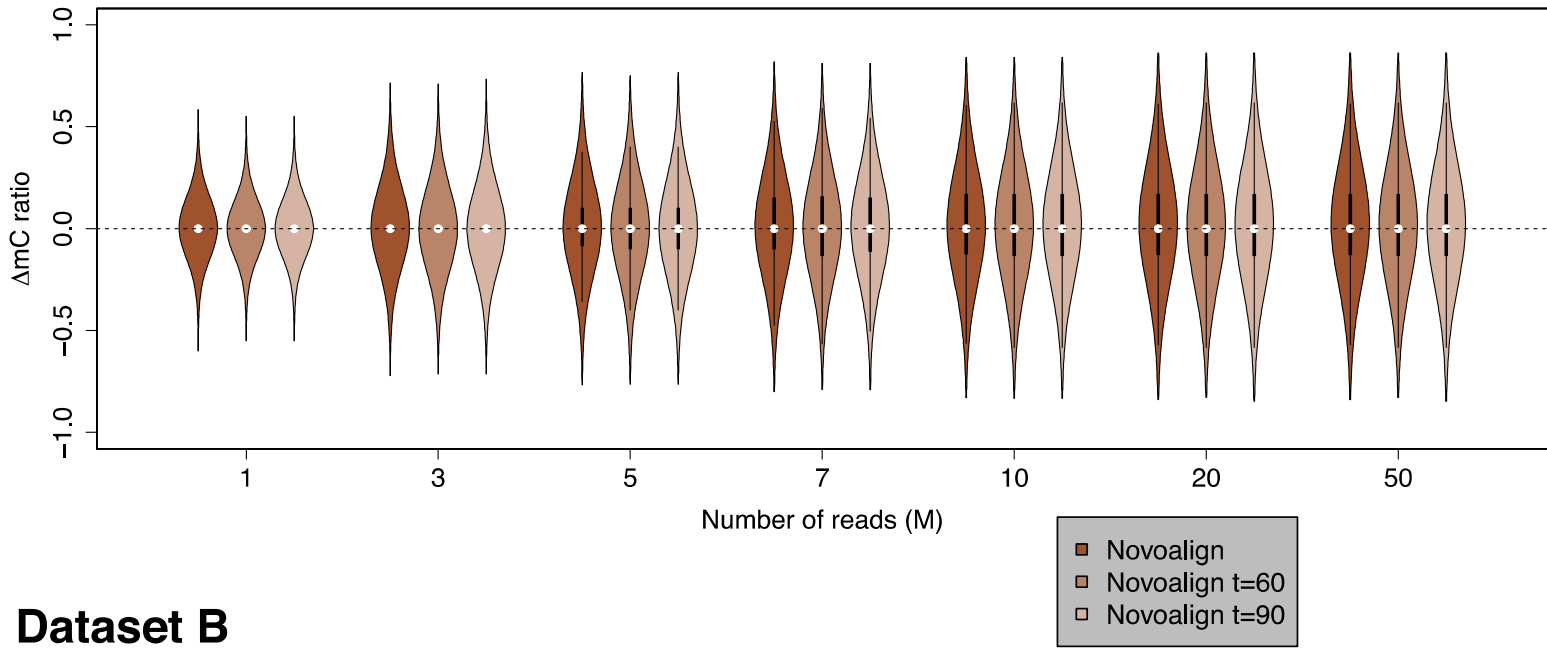

## Dataset B

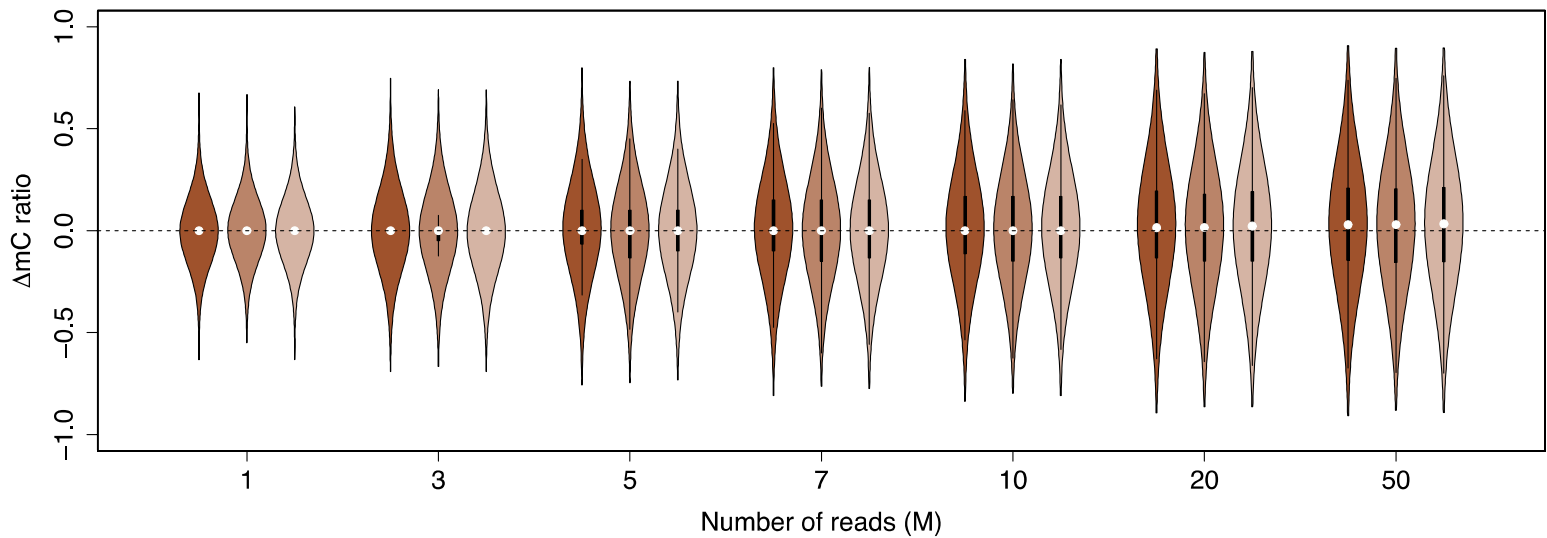

Supplement: supp_gkt1373_nar-03092-met-g-2013-File008.pdf [file supp_gkt1373_nar-03092-met-g-2013-File008.pdf]
